1 Anatomical and neurophysiological data on primary visual cortex  
2 suffice for reproducing brain-like robust multiplexing of visual  
3 function

4 This is an old version of the paper, identical with the original submission to Science  
5 Advances.

6 Guozhang Chen, Franz Scherr, and Wolfgang Maass\*

7 Institute of Theoretical Computer Science, Graz University of Technology, Graz, Austria

8 April 28, 2022

9 **Abstract**

10  
11 Neural networks of the brain that process visual information have structural properties that differ  
12 significantly from those of neural networks which are commonly used for visual processing in AI,  
13 such as Convolutional Neural Networks (CNNs). But it has remained unknown how these structural  
14 differences are related to network function. We analyze visual processing capabilities of a large-scale  
15 model for area V1 that arguably provides the most comprehensive accumulation of anatomical and  
16 neurophysiological data that is currently available. Its network structure turns out to induce a number  
17 of characteristic visual processing capabilities of the brain, in particular the capability to multiplex  
18 different visual processing tasks, also on temporally dispersed visual information, with remarkable  
19 robustness to noise. This V1 model also exhibits a number of characteristic neural coding properties  
20 of the brain, which provide explanations for its superior noise robustness. Since visual processing in  
21 the brain is substantially more energy-efficient than implementations of CNNs in common computer  
22 hardware, such brain-like neural network models are likely to have also an impact on technology: As  
23 blueprints for visual processing in more energy-efficient neuromorphic hardware.

24 **Teaser**

25 A new generation of neural network models based on neurophysiological data can achieve robust multi-  
26 plexing capabilities.

27 **1 Introduction**

28 The comprehensive model (*1*) for a patch of cortical area V1 in mouse provides an unprecedented window  
29 into the dynamics of this brain area. We show that it also provides a unique tool for studying brain-  
30 style visual processing and neural coding. The architecture of V1 exhibits an interesting combination of

---

\*Corresponding author: [maass@igi.tugraz.at](mailto:maass@igi.tugraz.at)

31 feedforward and recurrent connectivity: Neurons are distributed over several parallel 2D sheets, commonly  
32 referred to as layers or laminae in neuroscience. The neurons are recurrently connected, but not randomly  
33 or in an all-to-all manner. Rather, synaptic connections exist primarily between nearby neurons, both  
34 within a layer and between layers. Connectivity between layers supports a strong feedforward stream of  
35 visual information from L4 to L2/3 to L5/6, that is complemented by a host of recurrent loops. The  
36 dominance of short connections makes it possible to combine in V1 extensive recurrent connectivity with  
37 a really small total wire length, which is essential for its physical realization.

38 The model of (1) integrates besides these anatomical details also a host of neurophysiological data about  
39 area V1. The point neuron version of this model that we are considering employs generalized leaky  
40 integrate-and-fire neurons, more precisely GLIF<sub>3</sub> neurons. These have in addition to the membrane  
41 potential two further hidden variables that model slower processes in biological neurons. The large  
42 diversity of neurons in the brain is reflected in the model of Billeh et al. through the use of 111 different  
43 types of GLIF<sub>3</sub> neuron models that have each been fitted to experimental data in the Allen Brain Atlas (2).

44 The original model of (1) is not able to solve nontrivial computing tasks, since its synaptic weights were  
45 chosen on the basis of sparse experimental data about the mean and variance of synaptic weights. In  
46 contrast, synaptic weights in the living brain are individually tuned through a host of synaptic plasticity  
47 processes, and these processes induce higher-order correlations between weights that are crucial for  
48 computing capabilities of the network. At present we do not have enough data about these plasticity  
49 processes to reproduce them in a model. But we can address the question of what visual processing capabilities  
50 are supported by the model if synaptic weights are aligned for visual processing tasks through  
51 stochastic gradient descent. We applied this strategy to 5 different visual processing tasks that have commonly  
52 been considered in biological experiments (3, 4, 5, 6, 7, 8). Afterward, our model achieved high  
53 accuracy simultaneously for all 5 tasks, while working in a biologically realistic sparse firing regime close  
54 to criticality (9, 10). Surprisingly, its performance level remained in the same high-performance regime  
55 as the brain, even when we subjected the V1 model to noise in the images and in the network that it  
56 had not encountered during training. We demonstrate that this out-of-distribution (OOD) generalization  
57 capability of the V1 model with regard to new perturbations is far superior to that of CNNs. We provide  
58 an explanation for that through an analysis of neural coding properties of these two types of models:  
59 Both use high-dimensional neural codes for images. But the neural representation in the model of Billeh  
60 et al. is more robust because it employs, like the brain (11), a power law for the explained variance in  
61 higher PCA components that is close to a theoretically optimal compromise between the opposing goals  
62 to create noise-robust neural codes and to capture many details of visual inputs. In contrast, neural codes  
63 in CNNs have a different power law which reveals a focus on the latter (12). In addition, we demonstrate  
64 that the model of Billeh et al. uses preferentially those dimensions of population activity for coding that  
65 are orthogonal to the largest noise dimensions, like the brain does (3).

66 Altogether our results show that the currently available anatomical and neurophysiological data, as  
67 compiled in (1), provide the basis for a new generation of neural network models for visual processing that  
68 can multiplex diverse visual processing capabilities in a highly robust manner. Furthermore, these neural  
69 network models provide new paradigms for neuromorphic computing since they combine multiplexing  
70 capability and robustness to noise with small total wire length and highly energy-efficient sparse activity.

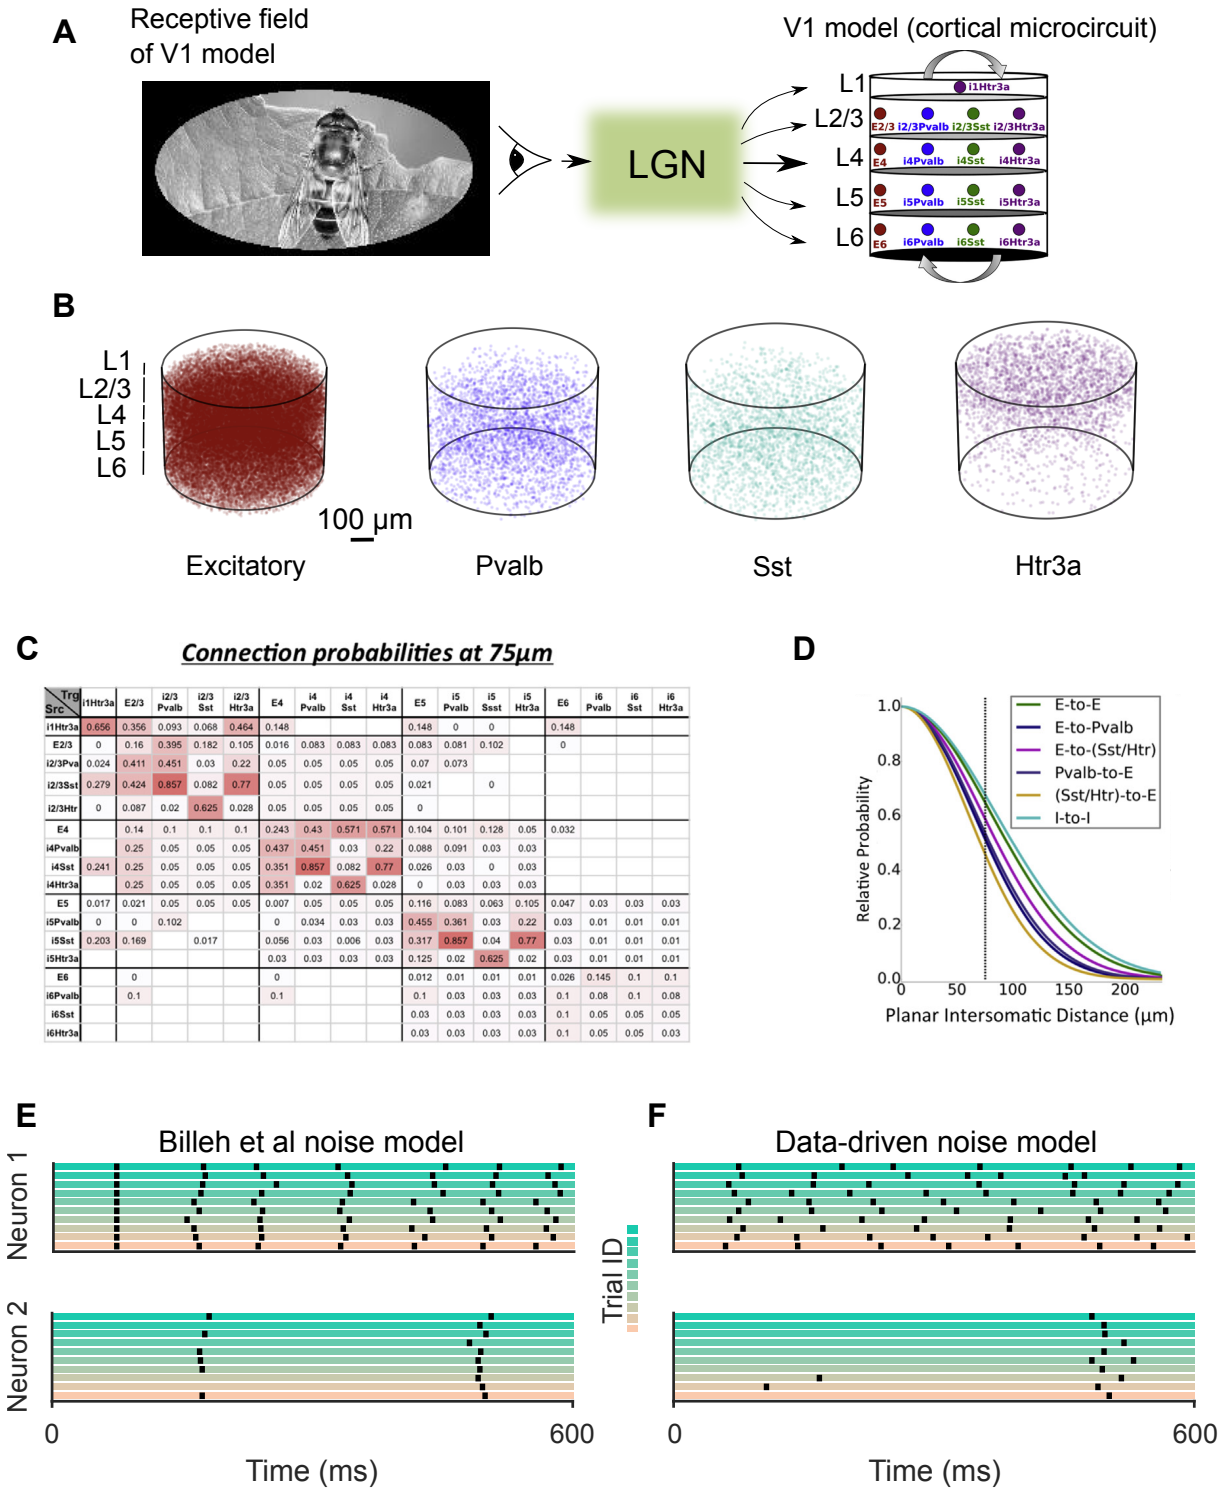

(caption next page)

---

**Figure 1 (previous page): V1 model of (1).** (A) The model consists of 4 classes of neurons on 5 layers. It comes together with a model for LGN, that transforms visual inputs into input currents to neurons in the V1 model. The LGN model receives visual input from an oval in the central part of an image (1). (B) The model contains one excitatory and three inhibitory neuron classes. Each dot denotes the position of a neuron. (C) The data-based base connection probabilities of (1) depend on the cell class to which the presynaptic (row labels) and postsynaptic neuron (column labels) belongs. White grid cells denote unknown values. (D) The base connection probability from (C) is multiplied according to (1) for any given pair of neurons by an exponentially decaying factor that depends on the lateral distance between them. Panels A, C, D are reproduced from (1). (E) Spike outputs of 2 randomly selected neurons from the Billeh et al. model for 10 trials with the same input (a trial of visual change detection task for natural images), using the noise model of Billeh et al. (F) Same as in (E) but for the version of the data-based noise model with  $s = q = 2$  that we used as default-noise model during testing. It causes substantially larger trial-to-trial variability.

## 71 2 Results

### 72 2.1 Integration of anatomical and neurophysiological data, as well as data on 73 noise in the brain, into a neural network model of area V1

74 Several decades of intense research efforts have accumulated a large body of knowledge about the anatomy  
75 and neurophysiology of the visual cortex, especially for primary visual cortex, i.e., for area V1. But it  
76 has remained unknown to what extent this insight into the structure of V1 can be related to its function.  
77 We have examined this question for the case of the large-scale model for a patch of V1 in mouse from (1),  
78 which is arguably the most comprehensive integration of anatomical and neurophysiological data on area  
79 V1 that is currently available. We will refer to the point neuron version of this model, also in combination  
80 with our data-based noise model that we discuss below, as the Billeh et al. model.

81 The Billeh et al. model is a spatially structured model for a patch of V1 that consists of 51,978 neurons  
82 from four main classes: One class of excitatory neurons and three classes of inhibitory neurons (Fig. 1B)  
83 that are distributed over 5 horizontal layers of neurons, labeled as L1, L2/3, L4, L5, and L6. Synaptic  
84 connections between these neurons are generated from data-based connection probabilities. These are  
85 defined in terms of base connection probabilities (Fig. 1C) that depend on the class and layer of the  
86 pre- and postsynaptic neuron. These base connection probabilities are scaled for each concrete pair of  
87 neurons by an exponentially decaying function of the lateral distance between their somata (Fig. 1D).  
88 This distance-dependent scaling entails that the vast majority of synaptic connections are between nearby  
89 neurons, and hence that the total wire length is small. But it also impacts the specific style of computa-  
90 tional processing in the V1 model: Information is not continuously spread out all over the network as in  
91 randomly connected recurrent neural networks, that are frequently used as models for neural networks of  
92 the brain. To transform images and movies into input currents to neurons in this V1 model, we employed  
93 the preprocessing module (LGN model) of (1), see Fig. 1A. It consists of 17,400 filters that model in a  
94 qualitative manner the responses of four classes of experimentally observed LGN neurons (sustained ON,  
95 sustained OFF, transient ON/OFF, and transient OFF/ON), that are further subdivided according to  
96 preferred temporal frequencies.

97 Individual neurons are modeled as point neurons. But in contrast to the customary leaky integrate-and-  
98 fire (LIF) neuron models, the Billeh model employs 111 different variations of the LIF model, which are  
99 referred to as generalized leaky integrate-and-fire (GLIF<sub>3</sub>) neuron models because they have in addition  
100 to the membrane potential two other internal variables that model after-spike currents in the neuron  
101 on slower time scales. These 111 different neuron types have been fitted to experimental data for 111  
102 selected neurons from the neocortex according to the cell database of the Allen Brain Atlas (2).

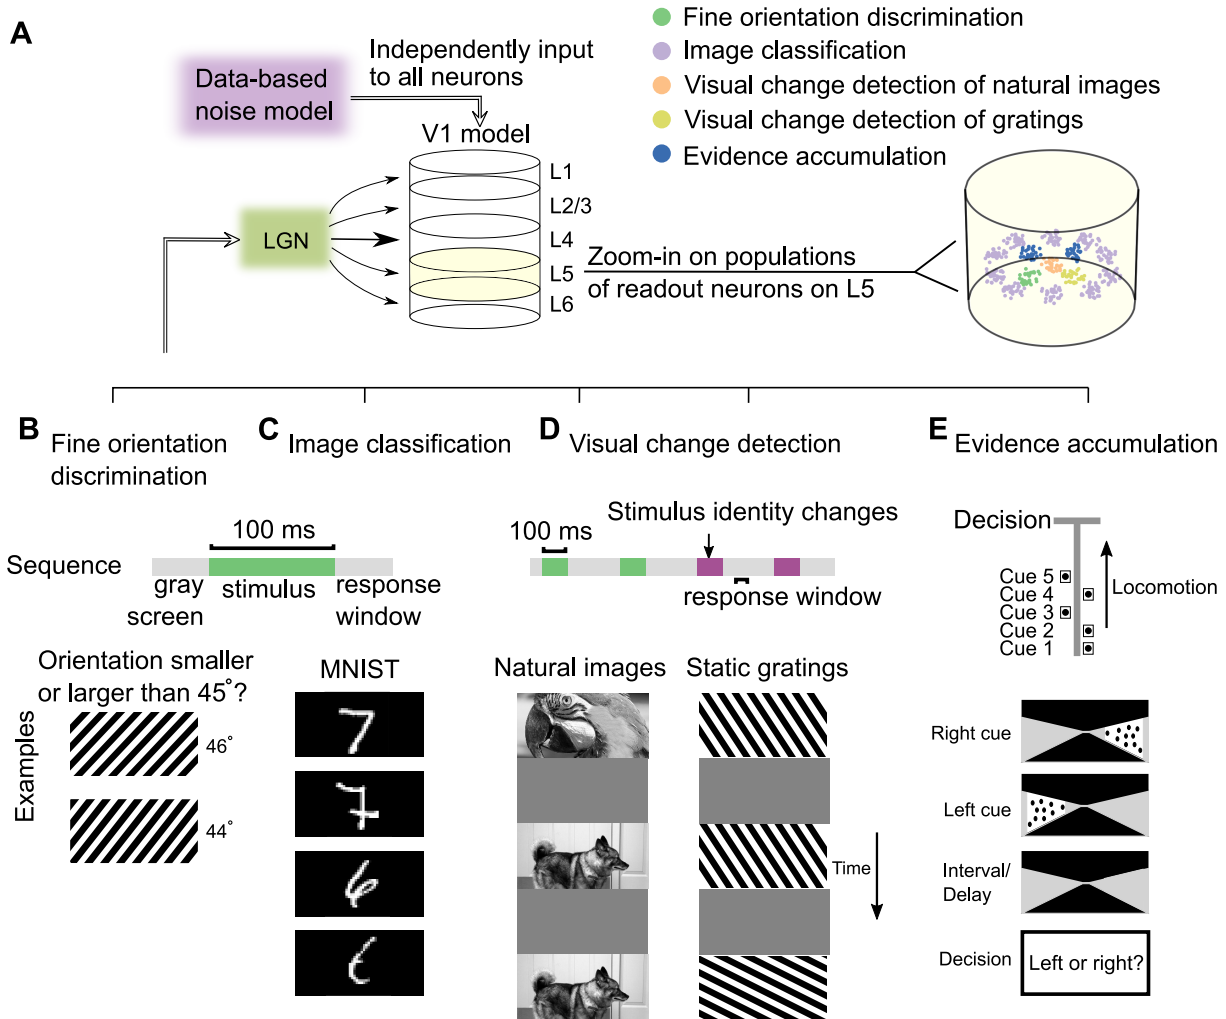

**Figure 2: Illustration of the readout convention and the 5 visual processing tasks for which the V1 model was trained.** (A) The visual stimuli for all 5 tasks were presented to the LGN model. Separate competing pools of pyramidal cells on L5 were chosen as readout neurons for each task. (B-E) Schematic diagrams and timings of 5 visual tasks (Materials and Methods). (B) In the fine orientation discrimination task, the network received a drifting grating with an orientation very close to 45°, and neurons in the corresponding readout pool had to fire if the orientation was larger than 45°. (C) For the image classification task, the network received a handwritten sample of a digit from 0 to 9 from the MNIST data set, and the corresponding one of the 10 readout pools for this task had to fire stronger than the others (two samples for digits 7 and 6 are shown). (D) For the visual change detection task, a long sequence of images was presented, with gray screens in between. A corresponding readout pool had to become active during the response window if the most recent image differed from the preceding one. Both natural images and static gratings were used. (E) In the evidence accumulation task, 7 cues were presented sequentially, and after a delay, a corresponding readout pool had to indicate through stronger firing whether the majority of the cues had been presented on the left or the right.

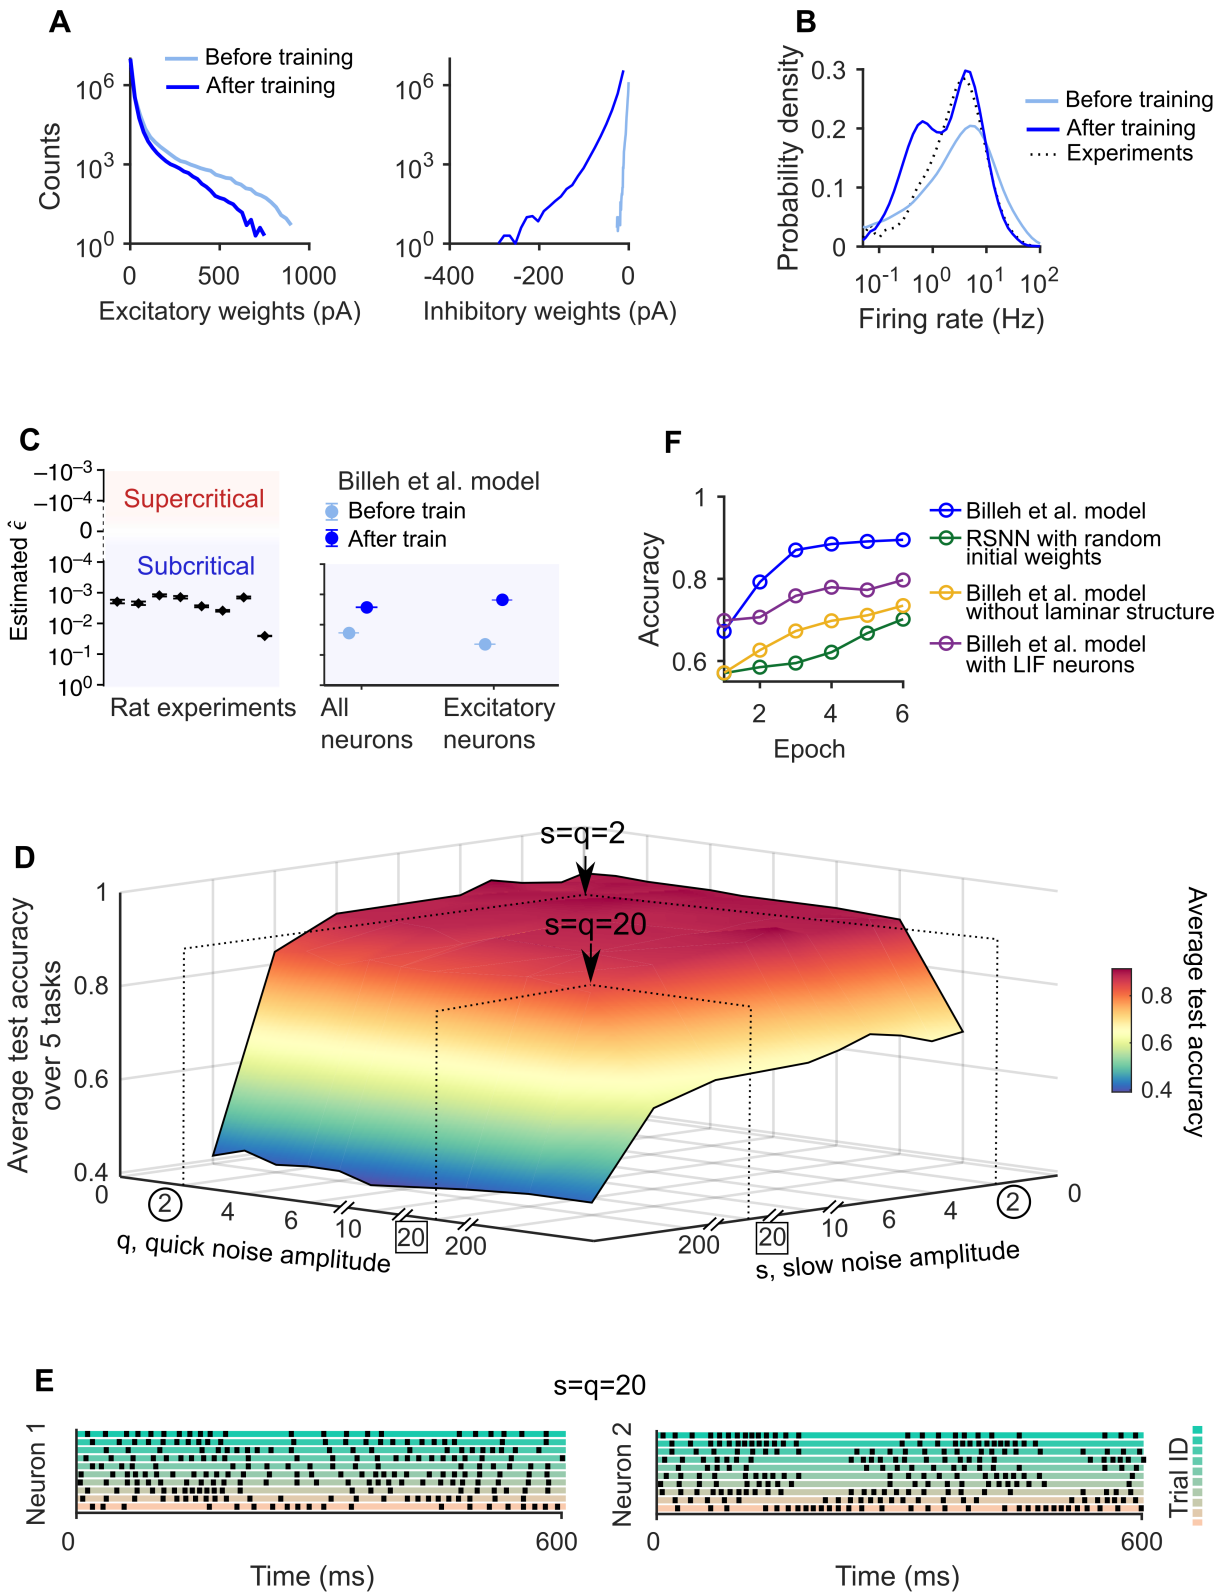

(caption next page)

**Figure 3 (previous page): Analysis of the V1 model after training.** (A) Distributions of excitatory weights (left) and inhibitory weights (right) before and after training. (B) Average distributions of firing rates for the 5 task before and after training. The distribution is moved through training closer to the one recorded in V1 (6). (C) Criticality of the Billeh model is analyzed and compared with experimental data. The y-axis shows estimates of  $\hat{\epsilon} = 1 - \hat{m}$ , where  $\hat{m}$  is the estimated branching ratio. Estimates of this value in the rat brain from (13) are reproduced on the left. The Billeh et al. model produces almost the same branching ratio as the brain, especially after training. Error bars on the left represent 16 to 84% confidence intervals. Error bars on the right represent SEM over 10 trials. (D) The average accuracy of the V1 model on test data for the 5 tasks, as function of the amplitude  $q$  of quick and the amplitude  $s$  of slow noise. The model had been trained just with the default noise of the Billeh model, which has much less impact on neural activity according to Fig. 1 E, F. The arrow in the back points to the accuracy for the default values  $s = q = 2$  for the data-based noise model. One sees that the average accuracy for the 5 tasks is also robust to much larger noise amplitudes, e.g. for  $s = q = 20$ , see arrow in front, it still has an average accuracy of 83.07%. The resulting trial-to-trial variability of neural firing is substantial for this noise level, see (E) for samples of spiking activity of the same 2 neurons as in Fig. 1E, F for 10 trials with the same network input (image). (F) Average test accuracy across 5 tasks of the V1 model and of control models that lacked salient structural features of the V1 model; plotted as a function of the number of training epochs (Materials and Methods). Deleting salient structural features of the V1 model caused substantially slower progress of stochastic gradient descent training.

103 The neurons in the model of (1) received besides inputs from the LGN model and inputs from other  
104 neurons also a small noise current. This noise was generated by a single Poisson source for all neurons.  
105 Hence this noise is highly correlated, but its amplitude is so small that it has only little impact on neural  
106 firing (Fig. 1E). We used this noise model during training, but instead used a data-based noise model  
107 during testing. This noise model is based on experimental data from area V1 of the awake mouse (11).  
108 More precisely, we employed the heavy-tailed distribution of noise amplitudes that arises from their  
109 experimental data (Fig. S1). Furthermore, we superimposed two forms of noise: A quick form noise with  
110 scaling factor  $q$  where a new value is drawn every ms from this distribution, mimicking for example noise  
111 that arises from stochastic synaptic release, and a slow form of noise with scaling factor  $s$ , where a new  
112 value is drawn from this heavy-tailed distribution once at the beginning of each trial. The latter mimics  
113 the well-known dependence of neural responses to the state of the network at the beginning of a trial, see  
114 e.g. (14). We use the default values  $s = q = 2$  for scaling these two forms of noise. The resulting noise  
115 model causes a qualitatively similar trial-to-trial variability of network responses in the V1 model as in  
116 the brain (compare Fig. S2B with Extended Data Fig. 5 of (11)). This trial-to-trial variability is shown  
117 for 2 sample neurons from the V1 model in Fig. 1F. The resulting Fano factor of spike counts in 10 ms  
118 windows has then a value of 1.46 in the V1 model, which is close to the measured value of 1.39 in mouse  
119 V1 (15). To get a clearer picture of the noise robustness of the V1 model, we tested its computational  
120 performance also for substantially larger values of the scaling factors  $q$  and  $s$  (Fig. 3E).

## 121 2.2 The V1 model can multiplex diverse computations on visual input streams

122 Classification of static images is a very popular test for neural networks. But brains have visual processing  
123 capabilities that go far beyond that, since visual information arrives in natural environments, especially in  
124 the presence of active vision, in a piecemeal manner. Hence brains need to be able to integrate temporally  
125 dispersed information, which can in general not be carried out by a feedforward neural network. Therefore  
126 we tested our model not only on a standard image classification task (handwritten digits from the MNIST  
127 dataset), but also on 4 tasks that require temporal integration of visual information. The latter ones  
128 have all been used in mouse experiments, and data on their behavioral performance are available. The 5  
129 selected tasks are illustrated in Fig. 2: Discrimination of subtle differences in the orientation of drifting  
130 gratings (Fig. 2B), as in the experiments of (3, 4), a generic image classification task (Fig. 2C), visual

131 change detection tasks for natural images and static gratings (Fig. 2D), as considered in (5, 6), and  
132 accumulation of temporally dispersed cues on the left and right (Fig. 2E), as considered in (7, 8), some  
133 of them with slightly longer delay periods.

134 In order to test the performance of the V1 model on these tasks, one has to specify a convention for  
135 extracting the network decision. One frequently used convention, see e.g. (16), is to let an external  
136 “readout neuron” that receives synaptic input from all neurons in the network produce the network  
137 decision (Fig. S3C). Obviously, there are no such readout neurons in the brain that receive synaptic  
138 inputs from all neurons in a patch of the neocortex. Furthermore, this convention is not suitable for  
139 probing the computational capability of such a network model. Theoretical results ( (17)) imply that  
140 if the network model is sufficiently large and has diverse units, such readout neurons tend to become  
141 computationally quite powerful when its weights have been properly trained, and is likely to mask the  
142 computational contribution of the neural network model itself. Therefore we demanded that in V1  
143 model, like in the brain (18), projection neurons within the network extract computational results from  
144 the model, and project them to downstream networks. In particular, a large fraction of pyramidal cells on  
145 L5 projects to subcortical areas, and can therefore use the computational result of the network to trigger  
146 a behavioral response. Therefore we selected for each computational task and each possible outcome of  
147 a network decision a population of 30 excitatory neurons on L5 (Fig. 2A). If this population produced  
148 more spikes during the response window than competing populations that voted for other outcomes,  
149 then the outcome for which it “voted” was viewed as the network decision. One important difference to  
150 the convention of using global readout neurons is that the set of neurons in the network that provides  
151 synaptic inputs to a neuron within the network is substantially smaller and spatially constrained.

152 With the values of synaptic weights provided by (1), the V1 model is incapable of performing any of the  
153 5 tasks; the accuracy is close to chance level. We then applied stochastic gradient descent, like in (19),  
154 to the synaptic weights of connections within the V1 model of Billeh et al., and to connections from the  
155 LGN model to the V1 model. No synaptic connections were added during this process. We also made  
156 sure that the signs of synaptic weights could not change, i.e., we maintained the validity of Dale’s law. We  
157 used a loss function for gradient descent that penalized inaccurate decisions by the chosen populations of  
158 readout neurons, see Materials and Methods. The loss function also penalized biologically unrealistic high  
159 firing rates. Stochastic gradient descent was implemented through a variation of BPTT, with the help  
160 of a suitable pseudo derivative for handling the discontinuous dynamics of spiking neurons, as suggested  
161 by (20). To avoid artifacts arising from gradient descent caused by the hard reset of GLIF<sub>3</sub> neurons  
162 after a spike, we subtracted instead a fixed value from the membrane potential after each spike. Control  
163 experiments show that this modification causes no significant difference in the spike output of a neuron  
164 (Fig. S4). We trained the model of Billeh et al. with its original noise model (Fig. 1E), and tested its  
165 performance with the biologically more realistic noise model of Fig. 1F, and also in the presence of even  
166 more noise.

167 After training, the Billeh et al. model achieved on all 5 tasks a performance that was in the same range  
168 as reported behavioral data (Table 1), with an average accuracy of 89.10%. This performance did not  
169 depend on our particular choice of readout neurons in L5: Choosing randomly distributed instead of  
170 co-located pyramidal cells yielded an average accuracy of 91.56%. As expected, choosing instead global  
171 linear readout neurons for each task led to a substantially higher accuracy of 97.73%. The differences  
172 of readout scenarios can explain why behavioral performance lags behind neural coding fidelity in area  
173 V1 (4) (Supplementary Note 1). Sample computations of the V1 model for each of the 5 tasks are shown  
174 in Fig. S5-S9.

175 The median strength of inhibitory synapses increased from 0.03 to 1.65 pA during training; the median  
176 weight of excitatory synapses decreased from 2.96 to 1.43 pA, see Fig. 3A, and Fig. S10 for more detailed  
177 analyses in terms of the neuron types involved. Also, the distribution of neural firing activity was after  
178 training still close to the measured distribution in the brain, see Fig. 3B, with an average firing rate of 4



179 Hz.

180 Experimental data suggest that neural networks of the brain typically operate in a critical regime (21,  
181 22, 10). We evaluated the criticality of the V1 model by measuring its branching ratio of neural activity,  
182 as suggested by (10). We found that both the untrained and the trained V1 model operates in a slightly  
183 subcritical regime. Training moved the model somewhat closer to the critical regime, reaching values of  
184 the branching ratio that almost perfectly matched recorded data from the brain (Fig. 3C). Hence the V1  
185 model operated in a dynamic regime that closely matches experimental data.

186 Interestingly, when the same training procedure was applied to control models that lacked salient struc-  
187 tural features of the Billeh et al. model, their task performance advanced substantially slower, see Fig. 3F  
188 and Supplementary Note 2. This result suggests that the laminar cortical circuitry of V1 supports the  
189 efficiency of stochastic gradient descent. In particular, slow internal processes within GLIF<sub>3</sub> neuron mod-  
190 els contribute to it because gradients move more effectively through the corresponding slowly changing  
191 internal variables than through spikes. We propose that the dominance of short connections within and  
192 between laminae of laminar cortical microcircuits in the brain also supports gradient descent learning,  
193 since local errors in computation are not immediately and continuously spread out all over the network  
194 like in randomly connected networks without this characteristic architecture of cortical microcircuits.

195 We tested the robustness of the resulting multiplexed visual processing capability of the V1 model after  
196 training by exposing its neurons to substantially larger amplitudes  $q$  and  $s$  of the data-based noise model,  
197 although it had never been exposed to such noise during training (where we only applied the really small  
198 noise considered in (1)). Surprisingly, it is almost impossible to destroy its multiplexed visual processing  
199 capability (Fig. 3D): It remained stable even when the amplitudes  $q$  and  $s$  of quick and slow noise were  
200 increased by several orders of amplitude.

### 201 **2.3 The power spectrum of neural codes provides an explanation for the** 202 **astounding robustness of visual processing by the V1 model**

203 An explanation for the robustness of visual processing in area V1 has been provided by (11). They verified  
204 through large-scale recordings from V1 in mouse a theoretically predicted link between noise robustness  
205 of visual processing and neural codes for images. They found that V1 employs high-dimensional neural  
206 codes for images, but the power of higher PCA components decays sufficiently fast so that its neural codes  
207 remain noise-robust. More precisely, they introduced a cross-validated principal component analysis that  
208 provides unbiased estimates of the stimulus-related variance. They found that the amount of explained  
209 variance continues to increase as further PCA dimensions were included without saturating below the  
210 dimensionality (= size)  $d$  of the image ensemble. We applied exactly the same analysis to the trained  
211 model of Billeh et al., and found that the model exhibited the same coding property (Fig. 4A). It was  
212 also shown in (11) that the explained variance of the  $n$ th principal component of network representations  
213 of images follows a power-law  $n^{-\alpha}$ . The exponent  $\alpha$  characterizes how fast the variance that is explained  
214 by higher PCA dimensions decays. Their theoretical analysis predicts that  $\alpha = 1 + 2/d$  is the optimal  
215 value (Fig. 4F), since this value provides a theoretically optimal compromise between encoding too many  
216 details (leading to smaller values of  $\alpha$ ), and keeping the neural code robust to perturbations (leading  
217 to larger values of  $\alpha$ ). Other theoretical work (23) also predicts that a value of  $\alpha$  close to 1 enhances  
218 under mild conditions downstream generalization performance. In-vivo recordings of (11) found that the  
219 value of  $\alpha$  for primary visual cortex of mouse is actually close to this optimal value  $\alpha = 1 + 2/d$ . This  
220 neural coding property of area V1 in the brain has gained additional interest through the contrasting  
221 result of (12). They found that feedforward CNNs, which are viewed to be substantially less noise robust  
222 than the brain, have in fact a smaller  $\alpha$ , as predicted by the theory. Hence we wondered whether our  
223 more brain-like neural network model for visual processing would exhibit a value that is closer to the

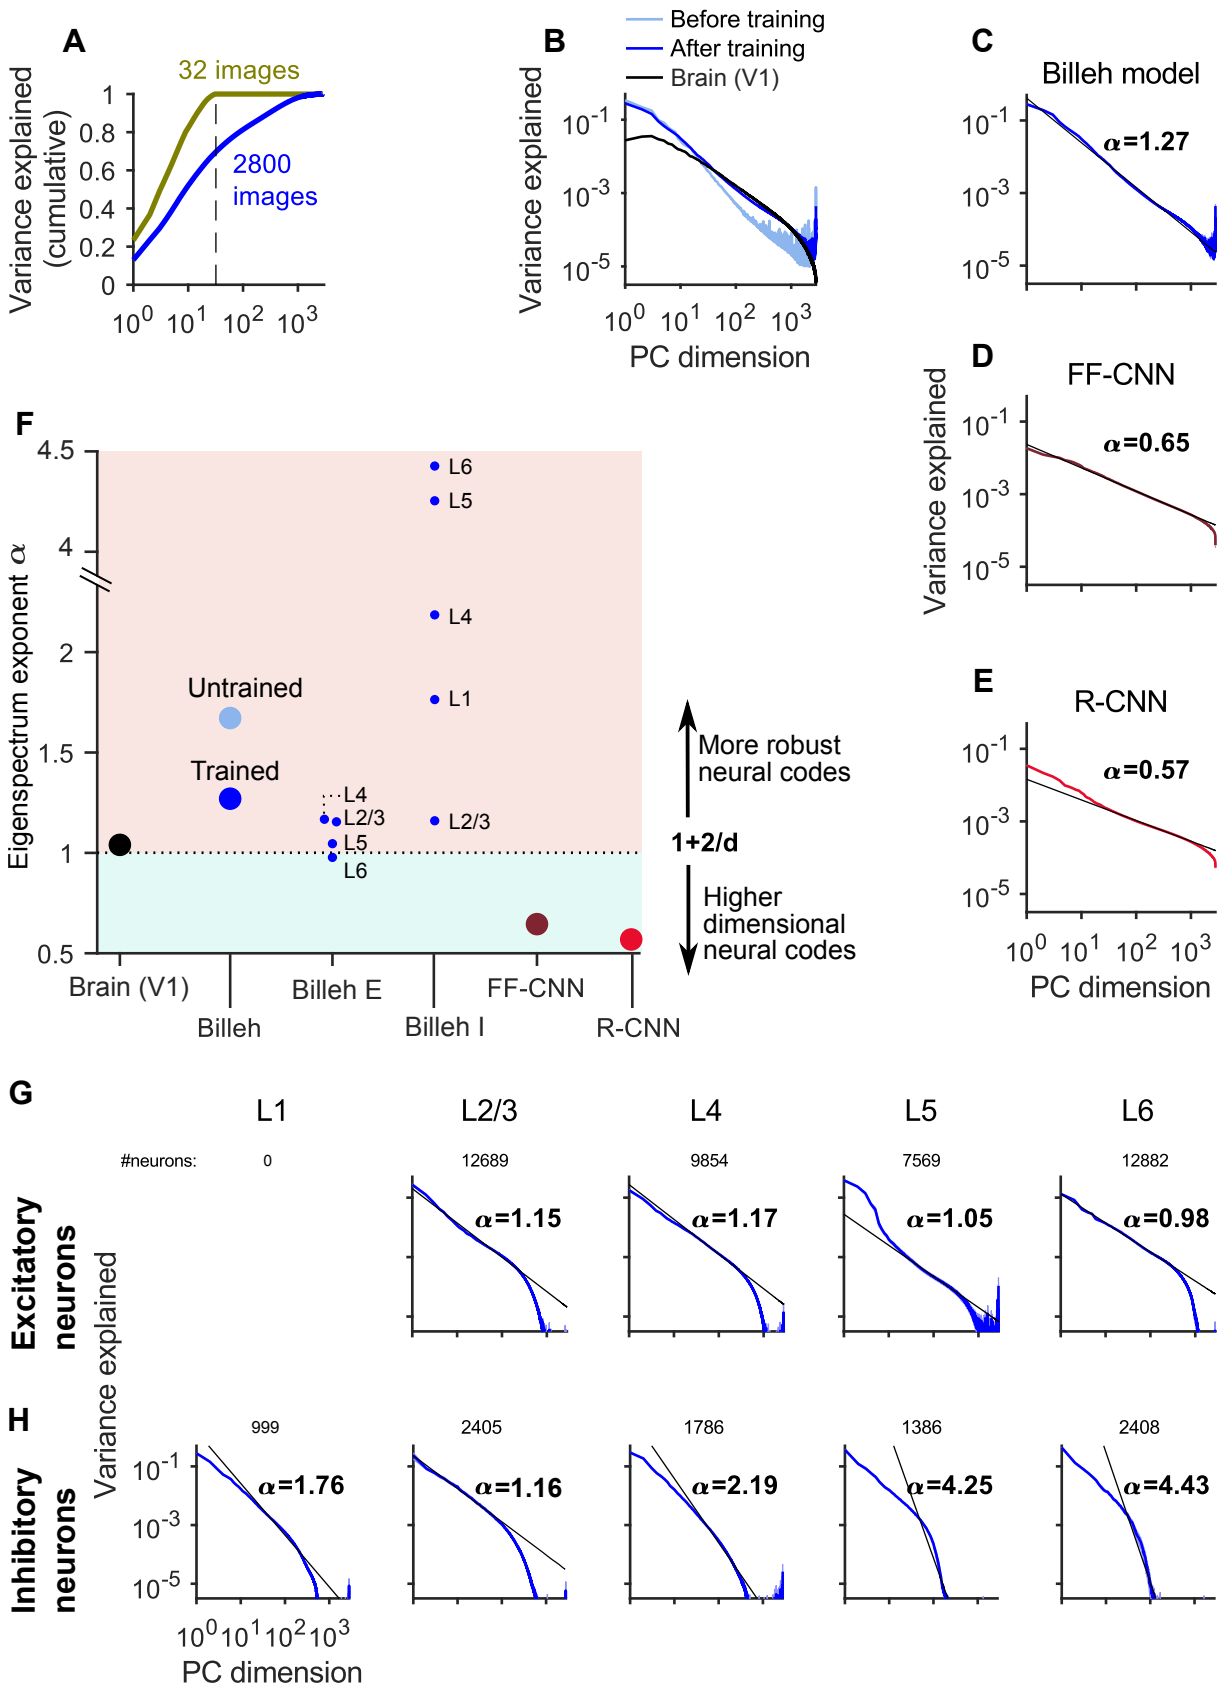

**Figure 4 (previous page): Comparing the eigenspectrum of neural codes in the V1 model of Billeh et al. with data from the brain, and with CNNs.** (A) As in the brain, the cumulative fraction of explained variance saturates only at the dimension of the input ensemble, here shown for  $d = 32$  and 2,800 natural images. (B) Eigenspectra of the untrained/trained V1 model of Billeh et al. with an ensemble of 2,800 randomly chosen natural images, and for mouse V1 (11). (C, D, E) Exponents of the power law for the V1 model of Billeh et al., for feedforward CNNs, and for recurrent CNNs; all for the same ensemble of 2,800 randomly drawn natural images. (F) Summary result for exponents of the power law for the brain the V1 model of Billeh et al., and for CNNs. (G) Eigenspectra of excitatory neurons on different layers of the model by Billeh et al. exhibiting values close to the measured value from a large sample of neurons in V1. (H) The same for inhibitory neurons. These exhibit on all layers except L2/3 substantially smaller coding fidelity.

224 theoretical optimum. We applied for that purpose the same measurement procedure as (11) to the V1  
225 model, for a set of 2,800 randomly drawn natural images. Figure 4B shows the eigenspectrum of PCA  
226 component for the model of Billeh et al. before and after training, and also the measured eigenspectrum  
227 of V1 responses from (11). One sees that the eigenspectrum of the model is already before training quite  
228 close to that of the brain, and is moved by training even closer. The resulting exponent  $\alpha$  of the power  
229 law (Fig. 4C) is for the model somewhat higher than in the brain. Fig. 4F, G, H suggest that this is  
230 largely due to the contributions of inhibitory neurons. They are generally found to have less precise  
231 neural codes for sensory stimuli, and consistent with that, their eigenspectra decayed substantially faster  
232 in the V1 model.

233 We have also reproduced the result of (12) that feedforward CNN has a substantially smaller value of  $\alpha$   
234 (Fig. 4D) and found that the recurrent CNN model of (24), which also achieves very high accuracy for  
235 image classification, has an even smaller value of  $\alpha$  (Fig. 4E). Altogether our results imply that the V1  
236 model has, unlike CNNs, similar neural coding properties as area V1 in the brain. Furthermore, these  
237 can be linked according to the theory of (11) to its remarkable noise robustness.

## 238 2.4 Comparing noise robustness and OOD generalization of the V1 model 239 and CNNs

240 Our preceding analyses of neural coding in the V1 model of Billeh et al. and CNNs suggest that the  
241 former is more noise-robust. Since it is hard to compare their robustness to noise within the networks with  
242 that of CNNs, because their computational units are so different, we compared instead their robustness  
243 to noise in the visual input, concretely to Gaussian pixel noise that was added to handwritten digits from  
244 the MNIST dataset. We used Gaussian noise with mean 0 and different SD. We first trained each type  
245 of neural network on the original dataset without noise, and then tested their classification performance  
246 on images with noise, see Fig. 5A for samples. Fig. 5B shows that the classification performance of the  
247 V1 model is substantially more robust to the added noise during testing, as predicted by the preceding  
248 analysis of the different neural coding strategies of the V1 model and CNNs.

249 Since neither of these networks had been trained with the noisy images for which they were tested, we  
250 are analyzing here a particular OOD (out-of-distribution) generalization capability of the V1 model and  
251 of CNNs. Fig. 5C demonstrates that even if CNNs are trained for a particular noise statistics, they do  
252 not perform well if they are tested on images with a different SD of Gaussian noise. In contrast, the V1  
253 model exhibited perfect OOD generalization in this respect. Also, the remarkable robustness of the V1  
254 model to noise within the network (Fig. 3D), which had not been present during training, can be viewed  
255 as an OOD generalization capability.

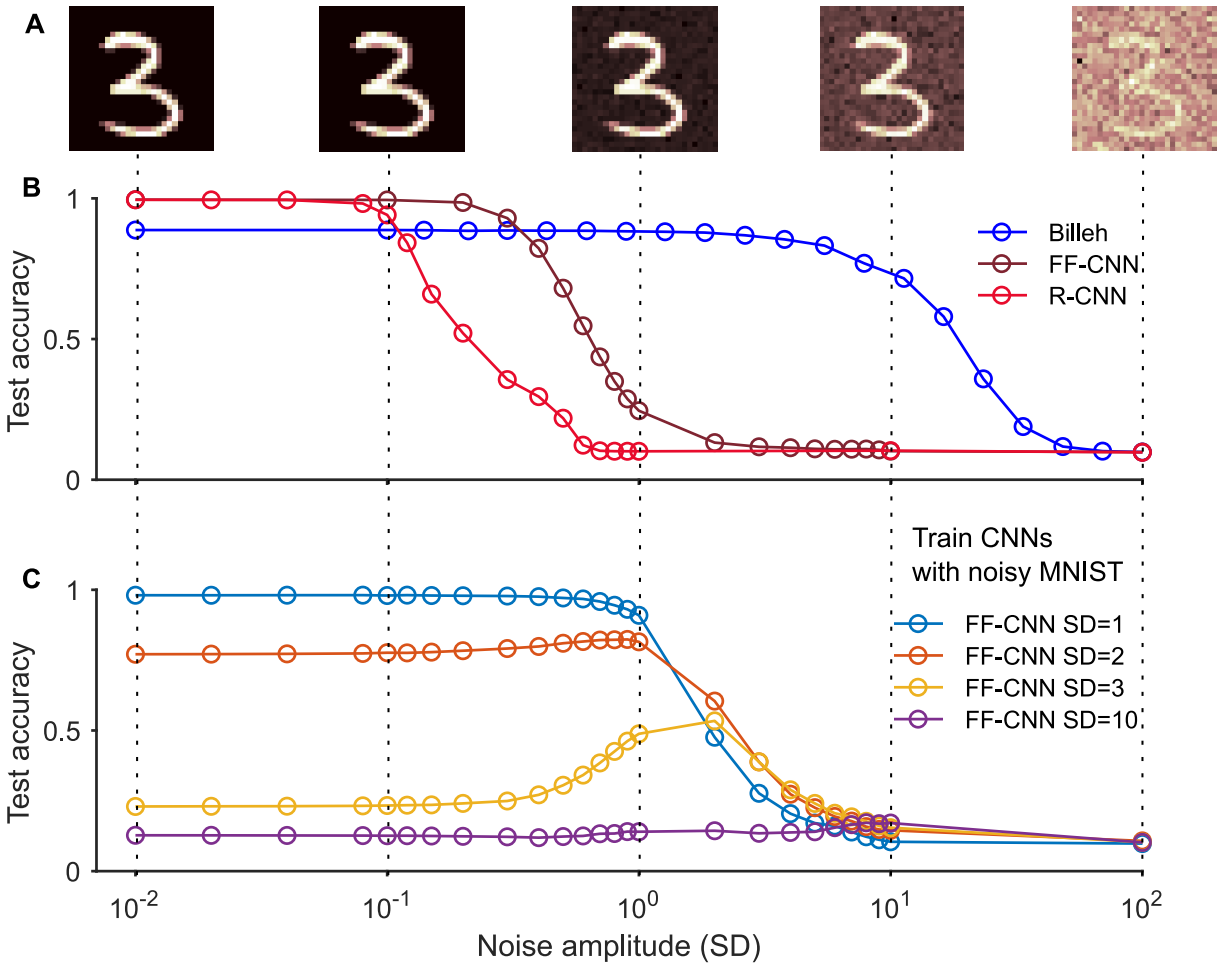

**Figure 5: Robustness of the V1 model and of CNNs to noise in images.** (A) Samples of handwritten MNIST digits with Gaussian noise drawn independently from  $\mathcal{N}(0, SD)$  for each pixel, for different values of the SD. (B) While the V1 model never quite reaches the peak performance of the CNNs, it tolerates noise with fairly high SD, whereas the performance of feedforward (FF)-CNNs and recurrent (R)-CNNs is substantially degraded even by noise with small SD. (C) Even when CNNs are trained on images with a particular noise statistics (SD), they do not generalize well to test images with a different value of SD. Furthermore, they do not achieve for SD between 1 and 10 the same noise robustness as the V1 model even when they were trained on images with that type of noise.

## 2.5 Neural coding dimensions for visual inputs are in the trained V1 model largely orthogonal to noise, like in the brain

A further explanation for robust coding capabilities of the brain was provided by experimental data of (3). They reported that dimensions in which differences between visual stimuli were encoded in the brain were nearly orthogonal to the largest noise mode, which therefore had little effect on coding fidelity. We carried out the same analysis for the V1 model, using the same visual stimuli (moving gratings with orientation differences that were close to the perception threshold). The definition of the discriminability index  $d'$ , according to (3) a proposed measure for the fidelity of neural population coding, is illustrated in Fig. 6A. Neural population responses  $\mathbf{r}_A(t)$  and  $\mathbf{r}_B(t)$  to two stimuli A and B form two distributions (ellipses). PLS (partial least square) analysis projects them onto a subspace where they become most distinct. The discriminability  $d'$  is defined as the separation,  $\Delta\boldsymbol{\mu}$ , of the two distributions along the dimension orthogonal to the optimal boundary (green line) for classifying stimuli in this subspace, divided by the SD of each distribution along this dimension.

The eigenvalues of the noise covariance matrix are plotted in Fig. 6B as function of the number of neurons that are sampled in the V1 model. We found that also in the V1 model the projection of the signal difference  $\Delta\boldsymbol{\mu}$  onto the eigenvectors for the largest noise eigenvalues is relatively small (Fig. 6C). Furthermore, compared with the untrained Billeh model, training of this model moved the signaling dimensions to become more orthogonal to the largest noise dimension, see Fig. 6D. The projection of  $(d')^2$  on an eigenvector can be interpreted as the signal-to-noise ratio because it is the ratio of the projected signal difference and noise eigenvalue (Materials and Methods).

It had been argued in (3) that the amount of visual information that is encoded in area V1 reaches a ceiling due to noise correlations. This result appeared to contradict the results of (11). A possible explanation of this discrepancy was offered in (4): They conjectured that the seemingly limited coding capability of V1 could be explained by the relatively small number of up to 1,300 neurons from which simultaneous recordings had been carried out in (3). They suggested that the apparent “ceiling” would rise if one records from more neurons. We tested this hypothesis in the V1 model of Billeh et al., and found that indeed the corresponding measurement  $d'$  for the total amount of encoded information keeps increasing, although at a somewhat slower rate, when the number of neurons from which one records in the model rises from 1,300 to 51,978, see Fig. 6E.

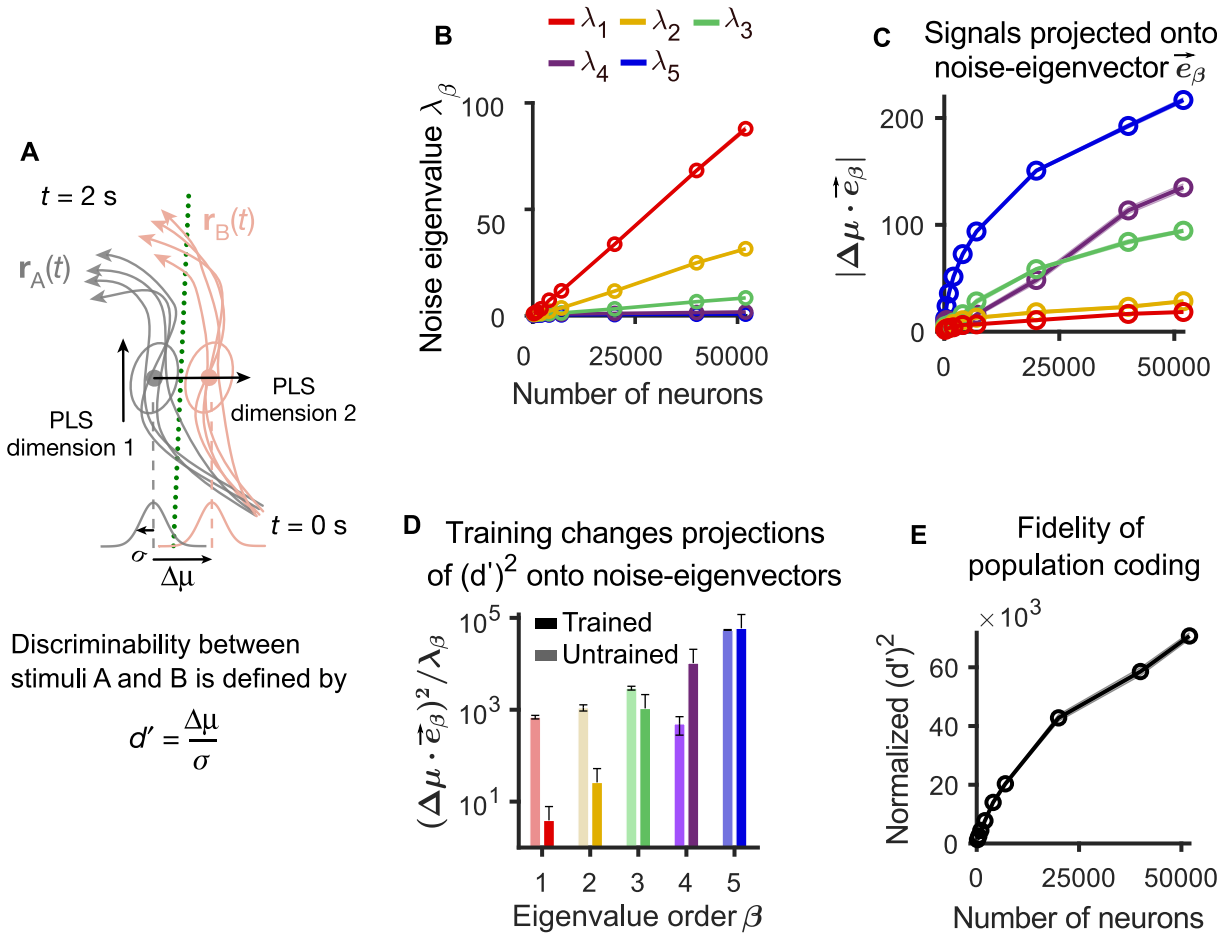

**Figure 6: Analyses of relations between signaling and noise dimensions in the V1 model, and of the impact of noise correlations when one considers larger numbers of neurons.** (A) Schematic of the calculation of the discriminability index  $d'$  according to  $(\beta)$ . (B) The 5 largest eigenvalues  $\lambda_\beta$  ( $\beta = 1, 2, \dots, 5$ ) of the noise covariance matrix in the trained V1 model increase linearly with the number of sampled neurons. (C) Neural coding dimensions  $(\Delta\mu)$  in the trained V1 model were nearly orthogonal to the dominant eigenvectors of the noise covariance matrix,  $\vec{e}_\alpha$ , invariant to neuron numbers. (D) Training moved the neural coding dimensions so that they became more orthogonal to the dominant noise dimensions. (E) The squared discriminability index  $(d')^2$  kept increasing when applied to more neurons on the V1 model.  $d'$  values were normalized by those obtained for trial-shuffled data (averaged across 1 s). Shaded areas in (B, D, E) and error bars in (C) represent the standard error of mean (SEM) over 100 trials.

### 285 3 Discussion

286 We have demonstrated that the neural network model of (*I*), which arguably provides the largest cur-  
287 rently available accumulation of anatomical and neurophysiological data on area V1 in the mouse brain,  
288 provides not only a window into brain dynamics, but also into visual processing capabilities and neural  
289 coding properties that are entailed by these data. CNNs are currently in AI one of the most commonly  
290 considered types of neural networks for visual processing. They were also inspired by some aspects of  
291 visual processing in the brain, especially the existence of simple and complex cells in area V1. But a  
292 closer look shows that they differ from V1 in the brain in almost all other respects: With regard to their  
293 computational units (artificial neurons in CNNs versus spiking neurons in the brain), the diversity of their  
294 units (very few simple units versus a large diversity of neurons with different temporal dynamics), their  
295 large-scale architecture (usually feedforward, versus recurrent with laminar structure), their small-scale  
296 architecture (very simple network motifs versus a complex combination of feedforward and recurrent  
297 processing in cortical microcircuits), and total wire length (almost quadratic versus just linear growth  
298 with the number of processing neurons). But V1 in the brain also differs from CNNs with regard to  
299 two important visual processing capabilities: The brain can multiplex strategies for solving diverse visual  
300 tasks within the same network, in particular also tasks that require integration of sequentially arriving  
301 visual information. In addition, visual processing in the brain is very noise-robust, also to new types  
302 of noise (OOD generalization). We have shown here that the previously listed fundamental differences  
303 between the structure of V1 in the brain and CNNs are causally related to these two superior visual  
304 processing capabilities of the brain: The V1 model of (*I*), that integrates these structural features of V1  
305 in the brain, is able to multiplex robust visual processing.

306 Since we can reproduce now these two important functional capabilities of area V1 in a model, we have  
307 a new research platform at our disposal for studying how neural coding properties of the brain emerge  
308 from its anatomical and neurophysiological features, and how they are related to its visual processing  
309 capabilities. We have demonstrated here the feasibility of this new research strategy by applying to the  
310 V1 model, an analysis of its neural coding that had already been used successfully for elucidating neural  
311 codes for images in area V1 of the brain: We analyzed the eigenspectrum of the explained variance of  
312 principal components of its neural codes for images. We found that the listed structural features of V1  
313 in the brain do in fact induce a salient feature of its neural coding strategy: The V1 model exhibits a  
314 similar power law for neural codes of images as the brain. In contrast, CNNs have a power law with  
315 a substantially slower decay of the eigenspectrum. According to the theoretical analysis of (*11*), this  
316 implies that neural codes in CNNs are less noise-robust. Our V1 model also demonstrates that a further  
317 salient aspect of neural coding in area V1 of the brain results from its anatomical and neurophysiological  
318 details: According to (*3*) about 90% of the noise fluctuations in area V1 of the brain are constrained to  
319 dimensions of the population activity that are orthogonal to noise dimensions. We found that this is in  
320 fact an emergent property of the V1 model of (*I*).

321 On a more general level, we have shown that the V1 model of (*I*) can be seen as the first prototype of a  
322 new generation of neural network models for visual processing that capture substantially more features of  
323 brain processing than CNNs. Further work is needed to tease apart the functional implications of each of  
324 its structural features, and to port similar advanced brain-like visual processing capabilities into simpler  
325 neural network models. Often one uses instead of data-based models for neural networks of the brain  
326 randomly connected recurrent networks of strongly simplified neuron models. In our experience, neural  
327 coding and computational properties of recurrent neural networks vary substantially in dependence of  
328 their connectivity structure and neuron models. This highlights the need to test brain-like features not  
329 only in abstract models, but also in neural network models that integrate our available knowledge about  
330 the actual structure of these neural networks in the brain.

331 We propose that our method can also be applied to investigate how anatomical and neurophysiological

332 details of interconnected higher and lower brain areas carry out distributed computations, in particular  
 333 how higher cortical areas enhance visual processing capabilities of V1. A substantial body of anatomical  
 334 and neurophysiological data on higher cortical areas and their connectivity to V1 is currently available  
 335 for that, see e.g. (6, 25, 26). We expect that deficits in visual processing capabilities of the V1 model,  
 336 such as limited spatial integration of image features and a relatively short working memory time span,  
 337 will disappear when the V1 model is combined with models of higher brain areas.

338 The analysis of neural coding in the V1 model has produced a number of predictions for future biological  
 339 experiments. In particular, we have shown in Fig. 6E that correlated noise reduces the coding fidelity of  
 340 the network, but does not produce an a-priori bound for its sensory discrimination capability (this had  
 341 already been hypothesized by (4)). A further prediction of our model is that the PCA eigenspectrum  
 342 of neural codes for inhibitory neurons does not obey a power law for higher dimensions, see Fig. 4H.  
 343 Finally, the values of excitatory synaptic weights in V1 are predicted to generally shrink through training  
 344 (Fig. 3A left), while inhibitory weights are predicted to become stronger (Fig. 3A right).

345 Visual processing in the brain exhibits also with regard to two aspects of physical implementations sub-  
 346 stantial advantages over CNNs: Most synaptic connections in V1 are between nearby units, which is  
 347 essential for an efficient physical realization of synaptic connections in neuromorphic hardware. This  
 348 architectural feature is also likely to support faster learning (Fig. 3F). In addition, computations are  
 349 carried out in the V1 model through event-based processing with very sparse firing activity. This com-  
 350 puting regime is not only very energy efficient, but it also supports computations on tasks where temporal  
 351 aspects play an important role, because it allows to let time represent itself in network computations.  
 352 Hence, our analysis of a neural network model for area V1 of the brain paves the way for substantially  
 353 more energy-efficient neuromorphic implementations of visual processing (27).

## 354 4 Materials and Methods

### 355 4.1 Neuron models

356 We based our study on the “core” part of the point-neuron version of the realistic V1 model introduced  
 357 by (1). To make it gradient-friendly, we replaced the hard reset of membrane potential after a spike  
 358 emerges with the reduction of membrane potential  $z_j(t)v_{th}$ , where  $z_j(t) = 1$  when neuron  $j$  fires at time  
 359  $t$  and  $z_j(t) = 0$  otherwise.  $v_{th}$  is the firing threshold of membrane potential. This causes no significant  
 360 change in the neural response (Fig. S4). We simulated each trial for 600 ms. The dynamics of the modified  
 361 GLIF<sub>3</sub> model was defined as

$$\begin{aligned}
 v_j(t + \delta t) &= \alpha v_j(t) + \frac{1 - \alpha\tau}{C} \left( I_j^e(t + 1) + \sum_m I_j^m(t + 1) + gE_L + I_j^{\text{syn}}(t) \right) - z_j(t)v_{th} \\
 z_j(t) &= H(v_j(t) - v_{th}) \\
 I_j^e(t) &= \sum_i W_{ji}^{\text{in}} x_i(t) + qK_j^{\text{quick}}(t) + sK_j^{\text{slow}},
 \end{aligned}
 \tag{1}$$

362 where  $C$  represents the neuron capacitance,  $E_L$  the resting membrane potential,  $I^e$  the external current,  
 363  $I^{\text{syn}}$  the synaptic current,  $g$  the membrane conductance, and  $v_{th}$  the spiking threshold.  $W_{ji}^{\text{in}}$  is the  
 364 synaptic weight from LGN neuron  $i$  to V1 neuron  $j$ . The scales of the quick noise  $K_j^{\text{quick}}(t)$  and the slow  
 365 noise  $K_j^{\text{slow}}$  to neuron  $j$  are  $q = 2$  and  $s = 2$ , respectively, unless otherwise stated.  $K_j$  was randomly  
 366 drawn from the empirical noise distribution which will be elaborated on later. The decay factor  $\alpha$  is  
 367 given by  $e^{-\delta t/\tau}$ , where  $\tau$  is the membrane time constant.  $\delta t$  denotes the discrete-time step size, which



368 is set to 1 ms in our simulations.  $H$  denotes the Heaviside step function. To introduce a simple model  
 369 of neuronal refractoriness, we further assumed that  $z_j(t)$  is fixed to 0 after each spike of neuron  $j$  for a  
 370 short refractory period depending on the neuron type. The after-spike current  $I^m(t)$  was modeled as

$$I^m(t + \delta t) = f^m I^m(t) + z(t) \delta I^m; m = 1, \dots, N_{\text{asc}}, \quad (2)$$

371 where the multiplicative constant  $f^m = \exp(-k^m \delta t)$  and an additive constant,  $\delta I^m$ . In our study,  $m = 1$   
 372 or 2. Neuron parameters have been fitted to experimental data from 111 selected neurons according to  
 373 the cell database of the Allen Brain Atlas (2), see (28, 1), including neuron capacity  $C$ , conductance  
 374  $g$ , resting potential  $E_L$ , the length of the refractory period, as well as amplitudes  $\delta I^m$  and decay time  
 375 constants  $k^m$  of two types of after-spike currents,  $m = 1, 2$ .

## 376 4.2 Synaptic inputs

377 The Billeh et al. model specifies the connection probability between neurons, based on experimental data.  
 378 The base connection probability for any pair of neurons from the 17 cell classes is provided in (1) by a  
 379 table (reproduced in Fig. 1C); white grid cells denote unknown values. The entries in this table are based  
 380 on measured frequencies of synaptic connections for neurons at maximal 75  $\mu\text{m}$  horizontal inter-somatic  
 381 distance. This base connection probability was scaled by an exponentially decaying factor in terms of  
 382 the horizontal distance of the somata of the two neurons (Fig. 1D). This distance-dependent scaling is  
 383 also based on statistical data from experiments (leaving aside finer details of connection probabilities).  
 384 The synaptic delay was spread in [1, 4] ms, which was extracted from the Fig. 4E of (1) and converted  
 385 to integers as the integration step is 1 ms.

The postsynaptic current of neuron  $j$  was defined by the following dynamics (1):

$$I_j^{\text{syn}}(t + \delta t) = e^{-\frac{\delta t}{\tau_{\text{syn}}}} I_j^{\text{syn}}(t) + \delta t e^{-\frac{\delta t}{\tau_{\text{syn}}}} C_j^{\text{rise}}(t) \quad (3)$$

$$C_j^{\text{rise}}(t + \delta t) = e^{-\frac{\delta t}{\tau_{\text{syn}}}} C_j^{\text{rise}}(t) + \sum_i W_{ji}^{\text{rec}} z_i(t) \frac{e}{\tau_{\text{syn}}}, \quad (4)$$

386 where  $\tau_{\text{syn}}$  is the synaptic time constant,  $W_{ji}^{\text{rec}}$  is the recurrent input connection weight from neuron  $i$  to  
 387  $j$ , and  $z_i$  is the spike of presynaptic neuron  $i$ . The  $\tau_{\text{syn}}$  constants depend on neuron types of pre- and  
 388 postsynaptic neurons (1).

## 389 4.3 Initial conditions

390 The initial conditions of spikes and membrane potentials were zero unless stated otherwise. The initial  
 391 conditions of  $\mathbf{W}^{\text{in}}$  and  $\mathbf{W}^{\text{rec}}$  were given by the values in (1) unless stated otherwise.

## 392 4.4 Data-driven noise model

393 The noise currents  $K_j^{\text{quick}}(t)$  and  $K_j^{\text{slow}}$  in Eq. 1 were randomly drawn from an empirical noise dis-  
 394 tribution. The quick noise  $K_j^{\text{quick}}(t)$  was drawn independently for all neurons in every 1 ms; the slow  
 395 noise  $K_j^{\text{slow}}$  was drawn independently for all neurons once 600 ms. The empirical noise distribution  
 396 (Fig. S1) was from the additive noise decoded from experimental data of mice response to 2,800 nature  
 397 images (11) ([https://figshare.com/articles/Recordings\\_of\\_ten\\_thousand\\_neurons\\_in\\_visual\\_cortex\\_in\\_response\\_to\\_2\\_800\\_natural\\_images/6845348](https://figshare.com/articles/Recordings_of_ten_thousand_neurons_in_visual_cortex_in_response_to_2_800_natural_images/6845348)). The decoding method was cross-validation  
 398

principal component analysis (cvPCA) (11) which will be elaborated later. It measures the reliable variance of stimulus-related dimensions, excluding trial-to-trial variability from unrelated cognitive and/or behavioral variables or noise. We collected the variability (additive noise) to form the empirical noise distribution. We refer to the methods and supplementary materials of (11) for a detailed mathematical analysis of this method.

## 4.5 Readout populations

By default we employed 15 readout populations in the V1 model, whose firing activity during the response window encoded the network decisions for the 5 visual processing tasks. Each population consisted of 30 randomly selected excitatory neurons in layer 5, located within a sphere of a radius of 55  $\mu\text{m}$ , with some distance between these spheres for different readout populations (Fig. S3A). The results were not sensitive to the number of neurons in each population (19). We also considered the case where the neurons in these readout populations were randomly distributed in L5 (Fig. S3B), and the case where each population was replaced by global linear readout neurons which received synaptic inputs from all neurons with activity ( $\mathbf{Z}$ ) in the V1 model, i.e.  $\mathbf{Y}_{\text{global}} = \mathbf{W}_{\text{readout}}\mathbf{Z} + \mathbf{B}$ ,  $\mathbf{B}$  is the bias (Fig. S3C).

## 4.6 Visual processing tasks

We designed details of these 5 tasks to be as close as possible to corresponding biological experiments while keeping them as simple as possible. Only for the image classification task (MNIST) there exist no corresponding mouse experiments.

**LGN model.** The visual stimuli were preprocessed by the LGN model (Fig. 2A) according to (1) (it is actually meant to model preprocessing by the retina and LGN in a qualitative manner). This LGN model consists of 17,400 spatiotemporal filters that model responses of LGN neurons in mouse to visual stimuli (29). Each filter produces a positive output that is interpreted as firing rates of a corresponding LGN neurons.

According to the requirements of this LGN model, each visual input pixel was first converted to gray-scale and scaled into an interval  $[-Int, Int]$ ,  $Int > 0$ . The output of the LGN model was injected into the V1 model as external currents, i.e.,

$$I_{\text{sti}} = \mathbf{W}^{\text{in}} \cdot \text{LGN}(G_{Int}), \quad (5)$$

where  $G_{Int}$  represents images scaled into  $[-Int, Int]$  for  $Int = 2$ .

**Fine orientation discrimination task.** In mouse experiments, mice were trained to distinguish orientation of drifting grating stimuli (3, 4). The stimuli were presented for 750 ms or longer. To reproduce this task under the limitations of GPU memory, we input drifting grating to the V1 model through the LGN model for 100 ms (Fig. 2B). As in (4), stimuli were sinusoidal drifting gratings (spatial frequency, 0.05 cycles per degree, drifting rate, 2 Hz). Both in the training and testing processes, the orientation was uniformly drawn from  $[43, 47]^\circ$  (i.e.,  $45 \pm 2$ ) with the precision of  $0.1^\circ$ . The orientation difference was the same as in (4). The initial phase was randomly sampled. The simulation sequence included 50-ms delay, 100-ms drifting gratings, and 50-ms response window in order.

In the response window, we defined the mean firing rate of readout population as

$$r_{\text{readout}} = \frac{1}{T_{\text{resp}} \cdot N_{\text{readout}}} \sum_{t=1}^{T_{\text{resp}}} \sum_{j=1}^{N_{\text{readout}}} z_j(t), \quad (6)$$

435 where the sum over  $j$  is over the  $N_{\text{readout}} = 30$  readout neurons and the sum over  $t$  is over the time  
436 length of response window  $T_{\text{resp}} = 50$  ms. If  $r > r_0 = 0.01$ , then this reported a network decision that  
437 the orientation was larger than  $45^\circ$ . Otherwise, it reported that the orientation was smaller than  $45^\circ$ .

438 **Image classification task.** To demonstrate that the V1 model is also able to classify images, we included  
439 the task to classify handwritten digits from 0 to 9 from the MNIST dataset (Fig. 2C). The timing of  
440 input images and response windows was the same as in the preceding task. The task was to decide which  
441 digit was denoted by the handwritten image (two samples for 7 and 6 are shown in Fig. 2C). Each of the  
442 10 readout populations for this task was assigned to one of the 10 digits. The network decision was taken  
443 to be that digit for which the readout population fired most strongly during the response window.

444 **Visual change detection task with natural images.** In mouse experiments (30, 6), mice were  
445 trained to perform the visual change detection task with natural images. A sequence of static natural  
446 images (250 ms), interleaved by short phases (500 ms) of gray screens, was presented as visual input;  
447 mice had to report whether the most recently presented image was the same as the previously presented  
448 one. To reproduce this task under the limitations of GPU memory, we presented natural images for  
449 100 ms each, with the gray delays between them lasting for 200 ms (Fig. 2D). Note that the first image  
450 was presented after 50 ms. All images were selected from a set of 40 randomly chosen images from the  
451 ImageNet dataset (31). The probability that the next image differed from the preceding one was set to  
452 50%. In case of a changed image identity, the model had to report within a time window of 50 ms length  
453 that started 150 ms after image onset (response window). If the mean firing rate of the readout population  
454 in the response window  $r_{\text{readout}} > r_0$ , it reported a network decision that the image had changed. The  
455 computation of the V1 model on this task has been further analyzed in (19).

456 **Visual change detection task with drifting gratings.** We also replaced the natural images above  
457 with static gratings which have different orientations and kept the input sequence the same (Fig. 2D).  
458 The setting of the static grating is the same as in the fine orientation discrimination task except it is  
459 static. The changing probability of orientation is 50%; the orientation of static gratings was uniformly  
460 drawn in  $[120, 150]$  (i.e.,  $135 \pm 15$ ) with the precision of  $0.1^\circ$ .

461 **Evidence accumulation task.** A hallmark of cognitive computations in the brain is the capability to  
462 go beyond a purely reactive mode: to integrate diverse sensory cues over time, and to wait until the right  
463 moment arrives for an action. A large number of experiments in neuroscience analyze neural coding after  
464 learning such tasks (see e.g., (7, 8)). We considered the same task that was studied in the experiments  
465 of (7, 8). There a rodent moved along a linear track in a virtual environment, where it encountered several  
466 visual cues on the left and right (Fig. 2E). Later, when it arrived at a T-junction, it had to decide whether  
467 to turn left or right. The network should report the direction from which it had previously received the  
468 majority of visual cues. To reproduce this task under the limitations of a GPU implementation, we used  
469 a shorter duration of 600 ms for each trial. The right (left) cue was represented by 50 ms of cue image in  
470 which the black dots on the right (left) side of the maze. Visual cues were separated by 10 ms, represented  
471 by the gray wall of the maze. After a delay of 250 ms, the network had to decide whether more cues had  
472 been presented on the left or right, using two readout populations for left and right. The decision was  
473 indicated by the more vigorously firing readout pool (left or right) within the response window of 50 ms.

## 474 4.7 Loss function

475 The loss function was defined as

$$L = L_{\text{cross-entropy}} + \lambda_f L_{\text{rate reg.}} + \lambda_v L_{\text{v reg.}}, \quad (7)$$

476 where  $L_{\text{cross-entropy}}$  represents the cross-entropy loss,  $\lambda_f$  and  $\lambda_v$  represent the weights of firing-rate regu-  
 477 larization  $L_{\text{rate reg.}}$  and voltage regularization  $L_{\text{v reg.}}$ , respectively. As an example, the cross-entropy loss  
 478 of visual change detection tasks was given by

$$L_{\text{cross-entropy}} = - \sum_m \left[ T^{(m)} \log \sigma \left( \theta \left( r_{\text{readout}}^{(m)} - r_0 \right) \right) + \left( 1 - T^{(m)} \right) \log \sigma \left( \theta \left( r_0 - r_{\text{readout}}^{(m)} \right) \right) \right], \quad (8)$$

479 where the sum over  $m$  is organized into chunks of 50 ms and  $r_{\text{readout}}^{(m)}$  denotes the mean readout population  
 480 firing rate defined in Eq. 6. Similarly,  $T^{(m)}$  denotes the target output in time window  $m$ , being 1 if a  
 481 change in image identity should be reported and otherwise 0. The baseline firing rate  $r_0$  was 0.01.  $\sigma$   
 482 represents the sigmoid function.  $\theta$  is a trainable scale ( $\theta > 0$ ) of firing rate.

483 We also used regularization terms to penalize unrealistic firing rates as well as unrealistic membrane  
 484 voltages. Their weights,  $\lambda_f = 0.1$  and  $\lambda_v = 10^{-5}$ . The rate regularization is given by the Huber loss (32)  
 485 between the target firing rates,  $y$ , calculated from the model in (1), and the firing rates,  $r$ , sampled the  
 486 same number of neurons from the network model:

$$L_{\text{rate reg.}} = \sum_j^N |\tau_j - \mathbb{I}\{\delta_j < 0\}| \frac{\mathcal{L}_\kappa(\delta_j)}{\kappa}, \quad \text{with} \quad (9)$$

$$\mathcal{L}_\kappa(\delta_j) = \begin{cases} \frac{1}{2} \delta_j^2, & \text{if } |\delta_j| \leq \kappa \\ \kappa \left( |\delta_j| - \frac{1}{2} \kappa \right), & \text{otherwise} \end{cases}$$

487 where  $j$  represents neuron  $j$ ,  $N$  the number of neurons,  $\tau_j = j/N$ ,  $\delta = 0.002$ ,  $\delta_j = r_j - r_j^{\text{target}}$ .  $\mathbb{I}(x) = 1$   
 488 when  $x$  is true;  $\mathbb{I}(x) = 0$  when  $x$  is false.

489 The voltage regularization was given by

$$L_{\text{v reg.}} = \frac{1}{N} \sum_{j=0}^{j=N} \left( \left[ \frac{v_j - E_L}{E_L} - 1 \right]^+ \right)^2 + \left( \left[ -\frac{v_j - E_L}{E_L} + 1 \right]^+ \right)^2, \quad (10)$$

490 where  $N$  represents the total number of neurons,  $v_j$ , the membrane potential of neuron  $j$ ,  $E_L$ , the resting  
 491 membrane potential,  $[\dots]^+$ , rectifier function.

## 492 4.8 Training and testing

493 We trained the model for all 5 tasks together. Pairs of visual inputs and target outputs were collected  
 494 in separate 64 batches for each task and these batches were interlaced during training. Apart from the  
 495 change detection tasks, the spikes and membrane potentials were reset to 0 after each trial that consisted  
 496 of 600 ms.

497 We applied back-propagation through time (BPTT) (19) to minimize the loss function. The non-existing  
 498 derivative  $\frac{\partial z_j}{\partial v_j}$  was replaced in simulations by a simple nonlinear function of the membrane potential that  
 499 is called the pseudo-derivative. Outside of the refractory period, we chose a pseudo-derivative of the form

$$\psi^t = \frac{\gamma_{\text{pd}}}{v_{\text{th}} - E_L} \exp \left( \frac{-(v_{\text{sc}}^t)^2}{\sigma_p^2} \right), \quad (11)$$

$$v_{\text{sc}}^t = \frac{v^t - v_{\text{th}}}{v_{\text{th}} - E_L},$$

**Table 1: The Billeh et al. model achieves high accuracy in all 5 tasks, consistent with the behavior performance of mice in similar tasks, after 6 training epochs.**

|                                           | Test accuracy              | Behavior accuracy             | Mean firing rate (Hz) | Spike raster |
|-------------------------------------------|----------------------------|-------------------------------|-----------------------|--------------|
| Fine orientation discrimination           | 93.15%                     | $\sim 83\%$ <sup>a</sup>      | 3.97                  | Fig. S5      |
| Image classification                      | 88.92%                     | N/A                           | 4.11                  | Fig. S6      |
| Visual change detection of natural images | 84.13%/83.25% <sup>b</sup> | $\sim 73\%/77\%$ <sup>c</sup> | 3.97                  | Fig. S7      |
| Visual change detection of gratings       | 89.25%                     | $\sim 60\%$ <sup>d</sup>      | 3.90                  | Fig. S8      |
| Evidence accumulation                     | 90.92%                     | $\sim 85\%$ <sup>e</sup>      | 3.96                  | Fig. S9      |

(a) Estimated from Fig. 4C of (33) when the orientation difference was  $90^\circ$ .

(b) In the visual change detection task for natural images, the two values refer to testing with familiar and novel images, respectively.

(c) Estimated from Fig. 1I of (5) when familiar and novel images were presented to mice, respectively.

(d) Estimated from Fig. 3A of (34) when the orientation difference was  $5^\circ$ .

(e) Estimated from Fig. 1C of (7) when the number of cues was 6.

Note that the behavioral experiments had longer time delays that made the tasks somewhat more difficult.

500 where the dampening factor  $\gamma_{pd} = 0.5$ , the Gaussian kernel width  $\sigma_p = 0.28$ . During the refractory  
501 period, the pseudo derivative was set to 0. During the training, we added the sign constraint on the  
502 weights of the neural network to keep Dale’s law. Specifically, if an excitatory weight was updated to a  
503 negative value, it would be set to 0; vice versa.

504 We would like to emphasize that we tested the trained model -whenever possible- for new visual stimuli  
505 that had not been shown during training (this was not possible for the gratings because there were  
506 not sufficiently many different visual stimuli for them). In that sense, we evaluated the generalization  
507 capability of the trained Billeh et al. model, rather than its capability to handle a fixed set of stimuli  
508 correctly (which often suffices to solve behavioral tasks in experiments). The model achieved on all 5  
509 tasks a performance that is in the same range as reported behavioral data from corresponding mouse  
510 experiments (Table 1).

## 511 4.9 Other simulation details

512 The BPTT training algorithm was coded, as the simulation of the model, in TensorFlow, which runs  
513 very efficiently on GPUs, and also on multiple GPUs for training in parallel. We employed independent  
514 simulations in parallel by distributing trials for all 5 tasks over batches. Every batch consisted of 320  
515 trials, 64 for each of the 5 tasks. In every trial, the model of Billeh et al. was simulated for 600 ms of  
516 biological time, which took, together with the calculation of gradients around 5 s on a NVIDIA A100  
517 GPU. Once all batches had finished (one step), gradients were calculated and averaged to update the  
518 weights by BPTT. We define an epoch as 781 iterations/steps, because this represents one cycle through  
519 the full training dataset of MNIST. This computation had to be iterated for 6 epochs until the average  
520 performance on the 5 tasks was saturated. This took 20 h of wall clock time on 160 GPUs.

## 521 4.10 Control models

522 We used three control models in Fig. 3F. The first one was a randomly connected recurrent network  
523 of spiking neurons with the same numbers of neurons and connections, referred to as RSNN. In the  
524 RSNN, all data-based features of Billeh et al. model except for the number of neurons and synapses

525 were removed: The GLIF<sub>3</sub> neuron model was replaced by the standard LIF model; neural connectivity  
526 representing laminar structure with primarily local connection was replaced by random connectivity;  
527 diverse neuron types were replaced by a single neuron type: the excitatory neuron on L2/3 (node type  
528 id in Allen brain atlas: 487661754); Dale’s law was removed; initial weights were replaced by random  
529 values drawn from the Gaussian distribution with the same mean and variance as the initial values of  
530 the Billeh et al. model. In the second control model (Billeh et al. model without laminar structure), we  
531 kept the diverse GLIF<sub>3</sub> neuron models, but the laminar connectivity structure was replaced by random  
532 connections, and we kept the same number of synaptic connections. In the third control model (Billeh  
533 et al. model with LIF neurons), the diverse GLIF<sub>3</sub> neuron models were replaced by the standard LIF  
534 neuron model, all other features were kept.

#### 535 4.11 Branching ratio as a measure for criticality

536 Based on the work of (35), where the branching ratio was recommended as a rather reliable measure for  
537 criticality of a network, we examined this branching ratio for the V1 model. In particular, this measure  
538 was shown there to be more robust to subsampling. The branching ratio is defined as the ratio of the  
539 number of neurons spiking at time  $t + 1$  to the number of spiking neurons at time  $t$ . Critical regimes, by  
540 their nature, are balanced and avoid runaway gain (positive or negative) and have a branching ratio of  
541 1.0. We stimulated the V1 model as in the visual change detection task of nature images for 15 s.

542 In a network with  $A$  active neurons at time  $t$ , if the branching ratio has a fixed value  $m$  then  $\langle A_{t+1} | A_t \rangle =$   
543  $m A_t + h$  where  $\langle | \rangle$  denotes the conditional expectation,  $m$  is the branching ratio and  $h$  is a mean rate of an  
544 external drive/stimulus. Considering subsampling,  $a_t$  is proportional to  $A_t$  on average  $\langle a_t | A_t \rangle = \eta A_t + \xi$ ,  
545 where  $\eta$  and  $\xi$  are constants. This subsampling leads to a bias:  $m (\eta^2 \text{Var}[A_t] / \text{Var}[a_t] - 1)$ . Instead of  
546 using time  $t$  and  $t + 1$ , this method focuses on times  $t$  and  $t + k$  with different time lags  $k = 1, \dots, k_{\text{maximum}}$ .  
547 With this, the branching ratio  $m_k$  is  $\langle a_{t+k} | a_t \rangle = m_k = \eta^2 \text{Var}[A_t] / \text{Var}[a_t] m^k = b m^k$ , where  $b$  is a  
548 constant. To compute  $m_k$  with different  $k$ , we obtained an exponential curve and extracted  $m$  from this  
549 curve.  $m < 1$  indicates a subcritical regime;  $m > 1$  indicates a supercritical regime;  $m = 1$  indicates a  
550 critical regime.

#### 551 4.12 Convolution neural networks

552 **Feedforward CNN.** We used ResNet-18 (36) as FF-CNN. To calculate its eigenspectra, we used the  
553 pre-trained version on ImageNet provided by PyTorch. To evaluate its robustness against pixel noise,  
554 we trained ResNet-18 on MNIST with the Adadelta optimizer. The batch size was 64; learning rate was  
555 1; weight decay was 0.0001; the coefficient used for computing a running average of squared gradients  
556 was 0.9; the term added to the denominator to improve numerical stability was  $1 \times 10^{-6}$ , the number of  
557 training epochs was 10.

558 **Recurrent CNN.** We used the gated recurrent convolution neural network (24) as R-CNN, inspired  
559 by abundant recurrent connections in the visual systems of animals. The gates control the amount  
560 of context information inputted to the neurons. We used the code, GRCNN-55 (weight sharing), in  
561 <https://github.com/Jianf-Wang/GRCNN>. To calculate its eigenspectra, we used the pre-trained version  
562 on ImageNet provided by (24). To evaluate its robustness against pixel noise, we trained R-CNN on  
563 MNIST with the stochastic gradient descent (SGD) optimizer. The batch size was 64; the learning rate  
564 was 0.1; the momentum was 0.9; the weight decay was 0.0001; the number of training epochs was 10.

### 565 4.13 Eigenspectrum analysis

566 **cvPCA.** Eigenspectra of Billeh et al. model were estimated by the explained variance of the neural  
567 response along with the  $n$ th principal component (computed from the first presentation). It is achieved  
568 by cvPCA that computes the covariance of the projections of neural responses for the two repeats onto  
569 this component. cvPCA measures the reliable variance of stimulus-related dimensions, excluding trial-  
570 to-trial variability from unrelated cognitive and/or behavioral variables or noise. It accomplishes this  
571 by computing the covariance of responses between two presentations of an identical stimulus ensemble  
572 (Fig. S2A). Because only stimulus-related activity will be correlated across presentations, cvPCA provides  
573 an unbiased estimate of the stimulus-related variance. Briefly, the algorithm operates as follows:

$$\begin{aligned} \mathbf{X}^{(1)} &= \mathbf{U}\mathbf{S}\mathbf{V}^\top && \text{(singular value decomposition)} \\ \widetilde{\mathbf{X}}^{(1)} &= \mathbf{X}^{(1)}\mathbf{V} && \text{(project data onto eigenvectors)} \\ \widetilde{\mathbf{X}}^{(2)} &= \mathbf{X}^{(2)}\mathbf{V} \\ \lambda_j &= \sum_{i=1}^s \widetilde{\mathbf{X}}_{ij}^{(1)}\widetilde{\mathbf{X}}_{ij}^{(2)}, \quad \text{for } j \in \{1, \dots, C\} && \text{(compute eigenvalue)} \end{aligned}$$

574 where  $\mathbf{X}^{(1)}, \mathbf{X}^{(2)} \in \mathbb{R}^{S \times N}$  ( $S$  is the number of stimuli and  $N$  is the number of neurons) are the neural  
575 responses for the first and second half of the trials (and averaged across trials),  $\mathbf{V} \in \mathbb{R}^{N \times C}$  are the  $C$   
576 eigenvectors of the covariance matrix of  $\mathbf{X}^{(1)}$  and  $\lambda \in \mathbb{R}^C$  are the cross-validated eigenvalues associated  
577 with each of the eigenvectors ( $\lambda_j$  is the  $j$ th eigenvalue).

578 The first step of the cvPCA algorithm computes the eigenvectors of the neural response covariance  
579 from one set of the trials. The second and third steps project the neural responses from each half of  
580 the trials onto each eigenvector. The final step computes the (scaled) variance of the neural responses  
581 when projected onto an eigenvector (that was computed using one half of the trials). Thus, each cross-  
582 validated eigenvalue is related to the amount of stimulus-related variance of the neural responses along  
583 the eigenvalue's corresponding eigenvector.

584 To be consistent with (11), we summed up spikes over 500 ms in response to visual stimuli. We ran  
585 cvPCA ten times on the response of the neural network fed with the same images that are used in (11).  
586 On each iteration randomly sampling the population responses of each stimulus from the two repeats  
587 without replacement. We ran ten different runs and found they were very similar to each other, i.e.,  
588 the SD was close to 0. For the trained Billeh et al. model, we calculated the eigenspectra in three  
589 models trained with different noise and randomly generated data, and found the SD is  $5.95 \times 10^{-5}$ . The  
590 displayed eigenspectra of the trained Billeh et al. model were averaged over these three models. The  
591 code is available in <https://github.com/MouseLand/stringer-pachitariu-et-al-2018b>.

592 **Billeh et al. model.** We analyzed the neural representation in the trained Billeh et al. model in the  
593 same way as responses of V1 neurons were analyzed in (11): Without loss of generality, we used 2,800  
594 generic images which were randomly drawn from ImageNet validation dataset in all panels of Fig. 4.  
595 We also tried the 2,800 nature images used in (11) and found they gave rise to a slower decaying speed  
596 of eigenspectrum (1.15); there were only used in Fig. S2B to compare with the noise level in mouse V1  
597 experiment. We also used a smaller set of 32 images, repeated 90 times. All stimuli were input 50 ms after  
598 the simulation onset and sustained for 500 ms in each trial to be the same as experimental procedures.  
599 They were presented twice to allow cross-validated analysis. The initial condition of membrane potentials  
600 and spikes was set to zeros, unless otherwise stated. We input the 2,800-nature-image stimuli 5 times

601 with different random seeds that were used to draw the noise and initial conditions of membrane potential  
602 and after-spike current from uniform distributions. We found that the results were not sensitive to the  
603 initial condition and noise.

604 **CNNs.** Generic images were resized so that their shorter dimension was 256 pixels and then center-  
605 cropped to  $224 \times 224$  pixels. Padding the image and resizing it to  $224 \times 224$  pixels achieved similar  
606 results. Images were additionally preprocessed by normalizing each image channel (RGB channels) using  
607 the mean and standard deviation that was used during model training (mean: 0.485, 0.456, 0.406 and  
608 SD: 0.229, 0.224, 0.225). For gray images, we repeated it to 3 channels. Using these preprocessed images,  
609 we extracted activation from every layer of each CNN and computed their eigenspectra using principal  
610 components analysis (PCA), because artificial neural responses are deterministic.

611 **Power-law fitting of eigenspectra.** Using the least-squares method, we fit power laws to the eigen-  
612 spectra,  $f(n)$ , against PC dimension,  $n$ . The fitting function is  $f(n) = n^{-\alpha}$  ( $n \in [n_{\min}, n_{\max}]$ ), where  
613  $n_{\min}$  and  $n_{\max}$  are lower and higher bounds, respectively. For most cases, we chose  $n_{\min} \in [1, 20]$  and  
614  $n_{\max} \in [301, 2800]$ . For the 32-grating recordings, owing to noise and the length of the spectrum, we chose  
615  $n_{\min} \in [1, 10]$  and  $n_{\max} \in [14, 35]$ . For each possible pair of  $n_{\min}$  and  $n_{\max}$ , we estimated the exponent  
616  $\alpha$  and its goodness-of-fit by the coefficient of determination ( $R^2$ ). We then selected as our estimate of  
617  $n_{\min}$ ,  $n_{\max}$ , and  $\alpha$  that gave the maximum  $R^2$  ( $> 0.99$ ) over all possibilities.

#### 618 4.14 Discriminability index $d'$ for neural responses to visual stimuli

619 To estimate how much information the neural activity conveyed about the stimulus identity, following (3),  
620 we used the metric  $d'$ , which characterizes how readily the distributions of the neural responses to the  
621 two different sensory stimuli can be distinguished (37). The quantity  $(d')^2$  is the discrete analog of Fisher  
622 information (38).

623 **Fig. 6A and E.** To be consistent with the experimental study (3), we calculated the neural response  
624 as the spike counts in each bin of 200 ms and evaluated two different approaches to compute  $d'$  values  
625 for the discrimination of the two different visual stimuli (gratings in the fine orientation discrimination  
626 task); the difference between two gratings is  $2^\circ$ ; each stimulus was presented in 500 trials. We analyzed  
627 the neural responses in a specific time bin relative to the onset of visual stimulation, which was called as  
628 instantaneous decoding approach used in (3). The alternative way, cumulative decoding, i.e., analyzing  
629 neural responses that were concatenated over time from the start of the trial up to a chosen time, demon-  
630 strated similar results. To determine  $d'$  accurately despite having about fewer trials than neuron number  
631 in the Billeh et al. model, we reduced dimensional by using partial least squares (PLS) analysis (39) to  
632 identify and retain only 5 population vector dimensions in which the stimuli were highly distinguishable  
633 as in (3). In this 5-dimensional representation, the neural dynamics evoked by the two stimuli become  
634 distinguishable over the first 200 ms of stimulus presentation. In the reduced space, we calculated the  
635  $(d')^2$  value of the optimal linear discrimination strategy as:

$$(d')^2 = \Delta\boldsymbol{\mu}^T \Sigma^{-1} \Delta\boldsymbol{\mu} = \Delta\boldsymbol{\mu}^T \mathbf{w}_{\text{opt}} \quad (12)$$

636 where  $\Sigma = \frac{1}{2}(\Sigma_A + \Sigma_B)$  the noise covariance matrix averaged across two stimulation conditions,  $\Delta\boldsymbol{\mu} =$   
637  $\boldsymbol{\mu}_A - \boldsymbol{\mu}_B$  is the vector difference between the mean ensemble neural responses to the two stimuli and  $\mathbf{w}_{\text{opt}} =$   
638  $\Sigma^{-1} \Delta\boldsymbol{\mu}$ , which is normal to the optimal linear discrimination hyperplane in the response space (38). Each  
639 entry of a covariance matrix is the covariance of spike counts of two neurons  $a_i$  and  $b_i$  ( $i \in \{1, 2, \dots, N\}$ ,  
640  $N$  is the number of trials):  $\frac{1}{N-1} \sum_{i=1}^N (a_i - \bar{a})(b_i - \bar{b})$  where  $\bar{x}$  is the mean of  $\{x_i\}$ .

641 We also calculated  $(d'_{\text{shuffled}})^2$ , the optimal linear discrimination performance using trial-shuffled datasets,  
642 which we created by shuffling the responses of each cell across stimulation trials of the same stimulus.



643 Owing to this shuffling procedure, the off-diagonal elements of  $\Sigma_A$  and  $\Sigma_B$  became near zero.  $(d'_{\text{shuffled}})^2$   
644 increased much faster with the increase of sampled neurons than  $(d')^2$ .

645 **Fig. 6B.** Noise eigenvalue  $\lambda_\beta$  and its eigenvector  $\vec{e}_\beta$  was calculated by eigen-decomposition of noise  
646 covariance matrix  $\Sigma$ .

647 **Fig. 6C.** To quantify the signals projected onto the eigenvector  $\vec{e}_\beta$ , we projected  $\Delta\mu$  onto  $\vec{e}_\beta$  and  
648 calculated its norm  $|\Delta \cdot \mu \vec{e}_\beta|$

649 **Fig. 6D.** To demonstrate that training makes signaling dimensions more orthogonal to the largest noise  
650 dimension, we decompose  $(d')^2$  into a sum of projections:

$$(d')^2 = \Delta\mu^T \Sigma^{-1} \Delta\mu = \sum_{\beta} \left( \frac{|\Delta\mu \cdot \vec{e}_\beta|^2}{\lambda_\beta} \right). \quad (13)$$

651 Because  $\Delta\mu \cdot \vec{e}_\beta$  corresponds to the signal projected on noise eigenvector  $\vec{e}_\beta$  and noise eigenvalue  $\lambda_\beta$   
652 corresponds to the noise scale on  $\vec{e}_\beta$ ,  $\frac{|\Delta\mu \cdot \vec{e}_\beta|^2}{\lambda_\beta}$  can be interpreted as signal-to-noise ratio on eigenvector  
653  $\vec{e}_\beta$ . Clearly, the eigenvectors well aligned with  $\Delta\mu$  are the most important for discriminating between  
654 the two distributions of neural responses.

## 655 Acknowledgements

656 We would like to thank Eben Kadile, Du Kai, Oleg Kolner, Christoph Stöckl, and Yujie Wu for helpful  
657 comments on an earlier version of the manuscript. Also, we would like to thank Sandra Diaz for advice  
658 and help regarding large-scale computations. Most of computations were carried out on the Human Brain  
659 Project PCP Pilot Systems at the Jülich Supercomputing Centre, which received co-funding from the  
660 European Union (Grant Agreement number 604102). We also would like to thank the Beijing Academy  
661 of Artificial Intelligence for providing computational resources. This research was partially supported by  
662 the Human Brain Project (Grant Agreement number 785907) of the European Union and a grant from  
663 Intel.

## 664 References

- 665 1. Y. N. Billeh, B. Cai, S. L. Gratiy, K. Dai, R. Iyer, N. W. Gouwens, R. Abbasi-Asl, X. Jia, J. H.  
666 Siegle, S. R. Olsen, *et al.*, Systematic integration of structural and functional data into multi-scale  
667 models of mouse primary visual cortex. *Neuron* **106**, 388–403 (2020).
- 668 2. Allen Institute, © 2018 Allen Institute for Brain Science. Allen Cell Types Database, cell feature  
669 search. Available from: [celltypes.brain-map.org/data](https://celltypes.brain-map.org/data) (2018).
- 670 3. O. I. Rumyantsev, J. A. Lecoq, O. Hernandez, Y. Zhang, J. Savall, R. Chrapkiewicz, J. Li, H. Zeng,  
671 S. Ganguli, M. J. Schnitzer, Fundamental bounds on the fidelity of sensory cortical coding. *Nature*  
672 **580**, 100–105 (2020).
- 673 4. C. Stringer, M. Michaelos, D. Tsyboulski, S. E. Lindo, M. Pachitariu, High-precision coding in visual  
674 cortex. *Cell* **184**, 2767–2778 (2021).

- 675 5. M. Garrett, S. Manavi, K. Roll, D. R. Ollerenshaw, P. A. Groblewski, N. D. Ponvert, J. T. Kiggins,  
676 L. Casal, K. Mace, A. Williford, Experience shapes activity dynamics and stimulus coding of VIP  
677 inhibitory cells. *eLife* **9**, e50340 (2020).
- 678 6. J. H. Siegle, *et al.*, Survey of spiking in the mouse visual system reveals functional hierarchy. *Nature*  
679 (2021).
- 680 7. A. S. Morcos, C. D. Harvey, History-dependent variability in population dynamics during evidence  
681 accumulation in cortex. *Nature neuroscience* **19**, 1672–1681 (2016).
- 682 8. B. Engelhard, J. Finkelstein, J. Cox, W. Fleming, H. J. Jang, S. Ornelas, S. A. Koay, S. Y. Thiberge,  
683 N. D. Daw, D. W. Tank, *et al.*, Specialized coding of sensory, motor and cognitive variables in vta  
684 dopamine neurons. *Nature* **570**, 509–513 (2019).
- 685 9. A. L. Barth, J. F. Poulet, Experimental evidence for sparse firing in the neocortex. *Trends in*  
686 *neurosciences* **35**, 345–355 (2012).
- 687 10. J. Wilting, V. Priesemann, 25 years of criticality in neuroscience—established results, open contro-  
688 versies, novel concepts. *Current opinion in neurobiology* **58**, 105–111 (2019).
- 689 11. C. Stringer, M. Pachitariu, N. Steinmetz, M. Carandini, K. D. Harris, High-dimensional geometry of  
690 population responses in visual cortex. *Nature* **571**, 361–365 (2019).
- 691 12. N. C. L. Kong, E. Margalit, J. L. Gardner, A. M. Norcia, Increasing neural network robustness  
692 improves match to macaque v1 eigenspectrum, spatial frequency preference and predictivity. *PLOS*  
693 *Computational Biology* **18**, 1-25 (2022).
- 694 13. J. Wilting, V. Priesemann, Inferring collective dynamical states from widely unobserved systems.  
695 *Nature communications* **9**, 2325 (2018).
- 696 14. A. Arieli, A. Sterkin, A. Grinvald, A. Aertsen, Dynamics of ongoing activity: explanation of the large  
697 variability in evoked cortical responses. *Science* **273**, 1868–1871 (1996).
- 698 15. J. S. Montijn, M. Vinck, C. Pennartz, Population coding in mouse visual cortex: response reliability  
699 and dissociability of stimulus tuning and noise correlation. *Frontiers in computational neuroscience*  
700 **8**, 58 (2014).
- 701 16. S. Haeusler, K. Schuch, W. Maass, Motif distribution, dynamical properties, and computational  
702 performance of two data-based cortical microcircuit templates. *Journal of Physiology-Paris* **103**,  
703 73–87 (2009).
- 704 17. W. Maass, T. Natschläger, H. Markram, Real-time computing without stable states: A new frame-  
705 work for neural computation based on perturbations. *Neural computation* **14**, 2531–2560 (2002).
- 706 18. K. D. Harris, G. M. G. Shepherd, The neocortical circuit: themes and variations. *Nature neuroscience*  
707 **18**, 170 (2015).
- 708 19. F. Scherr, W. Maass, Analysis of the computational strategy of a detailed laminar cortical microcircuit  
709 model for solving the image-change-detection task. *bioRxiv* (2021).
- 710 20. G. Bellec, D. Salaj, A. Subramoney, R. Legenstein, W. J. a. p. a. Maass, Long short-term memory  
711 and learning-to-learn in networks of spiking neurons (2018).
- 712 21. T. Mora, W. Bialek, Are biological systems poised at criticality? *Journal of Statistical Physics* **144**,  
713 268–302 (2011).

- 714 22. W. L. Shew, D. Plenz, The Functional Benefits of Criticality in the Cortex. *The Neuroscientist* **19**,  
715 88–100 (2012).
- 716 23. A. Ghosh, A. Mondal, K. Agrawal, B. Richards, Investigating power laws in deep representation  
717 learning. *arXiv preprint arXiv:2202.05808* (2022).
- 718 24. J. Wang, X. Hu, Convolutional neural networks with gated recurrent connections. *IEEE Transactions*  
719 *on Pattern Analysis and Machine Intelligence* (2021).
- 720 25. L. Campagnola, S. C. Seeman, T. Chartrand, L. Kim, A. Hoggarth, C. Gamlin, S. Ito, J. Trinh,  
721 P. Davoudian, C. Radaelli, *et al.*, Local connectivity and synaptic dynamics in mouse and human  
722 neocortex. *bioRxiv* (2021).
- 723 26. E. Iavarone, J. Simko, Y. Shi, M. Bertschy, M. García-Amado, P. Litvak, A.-K. Kaufmann,  
724 C. O’Reilly, O. Amsalem, M. Abdellah, *et al.*, Reconstruction and simulation of thalamoreticular  
725 microcircuitry. *bioRxiv* (2022).
- 726 27. P. Plank, A. Rao, A. Wild, W. Maass, A long short-term memory for ai applications in spike-based  
727 neuromorphic hardware. *Nature Machine Intelligence, in press. arXiv preprint arXiv:2107.03992*  
728 (2022).
- 729 28. C. Teeter, R. Iyer, V. Menon, N. Gouwens, D. Feng, J. Berg, A. Szafer, N. Cain, H. Zeng, M. Hawry-  
730 lycz, Generalized leaky integrate-and-fire models classify multiple neuron types. *Nature communica-*  
731 *tions* **9**, 1–15 (2018).
- 732 29. S. Durand, R. Iyer, K. Mizuseki, S. de Vries, S. Mihalas, R. C. Reid, A comparison of visual response  
733 properties in the lateral geniculate nucleus and primary visual cortex of awake and anesthetized mice.  
734 *Journal of Neuroscience* **36**, 12144–12156 (2016).
- 735 30. M. Garrett, S. Manavi, K. Roll, D. R. Ollerenshaw, P. A. Groblewski, N. D. Ponvert, J. T. Kiggins,  
736 L. Casal, K. Mace, A. Williford, A. Leon, X. Jia, P. Ledochowitsch, M. A. Buice, W. Wakeman,  
737 S. Mihalas, S. R. Olsen, Experience shapes activity dynamics and stimulus coding of vip inhibitory  
738 cells. *eLife* **9**, e50340 (2020).
- 739 31. J. Deng, W. Dong, R. Socher, L.-J. Li, K. Li, L. Fei-Fei, *2009 IEEE conference on computer vision*  
740 *and pattern recognition* (Ieee, 2009), pp. 248–255.
- 741 32. P. J. Huber, *Breakthroughs in statistics* (Springer, 1992), pp. 492–518.
- 742 33. S.-H. Lee, A. C. Kwan, S. Zhang, V. Phoumthipphavong, J. G. Flannery, S. C. Masmanidis,  
743 H. Taniguchi, Z. J. Huang, F. Zhang, E. S. Boyden, *et al.*, Activation of specific interneurons improves  
744 v1 feature selectivity and visual perception. *Nature* **488**, 379–383 (2012).
- 745 34. L. L. Glickfeld, M. H. Histed, J. H. Maunsell, Mouse primary visual cortex is used to detect both  
746 orientation and contrast changes. *Journal of Neuroscience* **33**, 19416–19422 (2013).
- 747 35. J. Wilting, V. Priesemann, On the ground state of spiking network activity in mammalian cortex.  
748 *arXiv preprint arXiv:1804.07864* (2018).
- 749 36. K. He, X. Zhang, S. Ren, J. Sun, *Proceedings of the IEEE conference on computer vision and pattern*  
750 *recognition* (2016), pp. 770–778.
- 751 37. C. M. Bishop, *Pattern Recognition and Machine Learning (Information Science and Statistics)*  
752 (Springer, 2007), first edn.
- 753 38. B. B. Averbeck, D. Lee, Effects of noise correlations on information encoding and decoding. *Journal*  
754 *of neurophysiology* **95**, 3633–3644 (2006).

- 755 39. P. Geladi, B. R. Kowalski, Partial least-squares regression: a tutorial. *Analytica chimica acta* **185**,  
756 1–17 (1986).
- 757 40. G. Bellec, F. Scherr, A. Subramoney, E. Hajek, D. Salaj, R. Legenstein, W. Maass, A solution to  
758 the learning dilemma for recurrent networks of spiking neurons. *Nature Communications* **11**, 3625  
759 (2020).

760 **Supplementary Information for:**

761 Anatomical and neurophysiological data on primary visual cortex suffice for reproducing brain-like  
762 robust multiplexing of visual function

763 Chen et al.

**Table S1: Performances on 5 tasks are not sensitive to the noise level. The light cyan highlights the noise level used in this study unless otherwise stated. VCDN is tested on novel images. FOD, fine orientation discrimination; IC, image classification; VCDN, visual change detection of nature images; VCDG, visual change detection of gratings; EA, evidence accumulation.**

|                    | FOD    | IC     | VCDN   | VCDG   | EA     |
|--------------------|--------|--------|--------|--------|--------|
|                    | acc.   | acc.   | acc.   | acc.   | acc.   |
| $q = 1, s = 0$     | 93.67% | 89.14% | 83.61% | 92.37% | 93.75% |
| $q = 1, s = 2$     | 93.09% | 88.49% | 83.42% | 89.22% | 92.92% |
| $q = 1, s = 3$     | 93.47% | 88.97% | 82.52% | 88.73% | 90.17% |
| $q = 1, s = 3.5$   | 93.73% | 88.49% | 81.11% | 88.58% | 91.00% |
| $q = 1, s = 4$     | 93.06% | 88.81% | 82.30% | 87.86% | 91.50% |
| $q = 2, s = 2$     | 93.15% | 88.92% | 83.25% | 89.25% | 90.92% |
| $q = 2, s = 3.5$   | 93.93% | 89.19% | 82.20% | 87.51% | 90.58% |
| $q = 3, s = 3$     | 94.10% | 88.81% | 81.87% | 89.52% | 92.25% |
| $q = 3, s = 4$     | 93.53% | 89.02% | 83.06% | 88.14% | 89.33% |
| $q = 4, s = 3$     | 93.91% | 88.91% | 82.53% | 88.16% | 91.33% |
| $q = 4, s = 4$     | 93.47% | 88.16% | 82.16% | 88.17% | 89.08% |
| $q = 5, s = 4$     | 93.32% | 88.49% | 81.41% | 89.12% | 90.58% |
| $q = 10, s = 10$   | 94.03% | 88.54% | 82.97% | 89.56% | 84.33% |
| $q = 20, s = 20$   | 91.01% | 86.63% | 77.41% | 85.95% | 77.75% |
| $q = 200, s = 200$ | 54.58% | 39.56% | 53.09% | 53.96% | 52.67% |

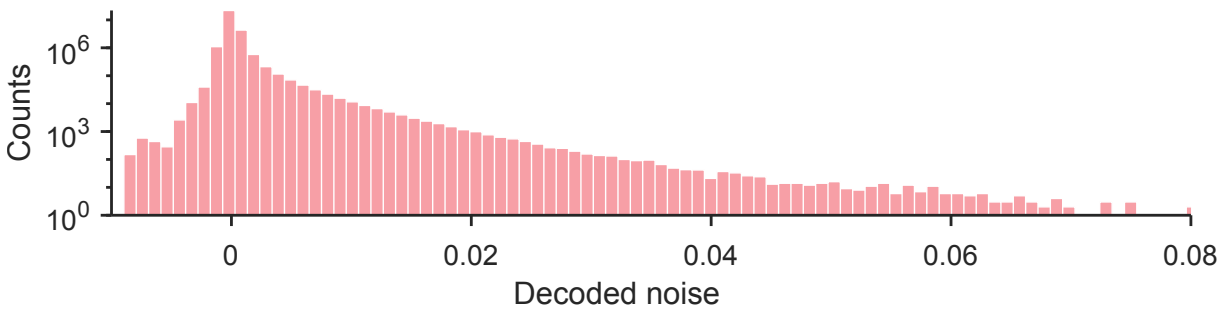

**Figure S1: Empirical noise distribution where we drew the noise values. They are based on experimental data from (11).**

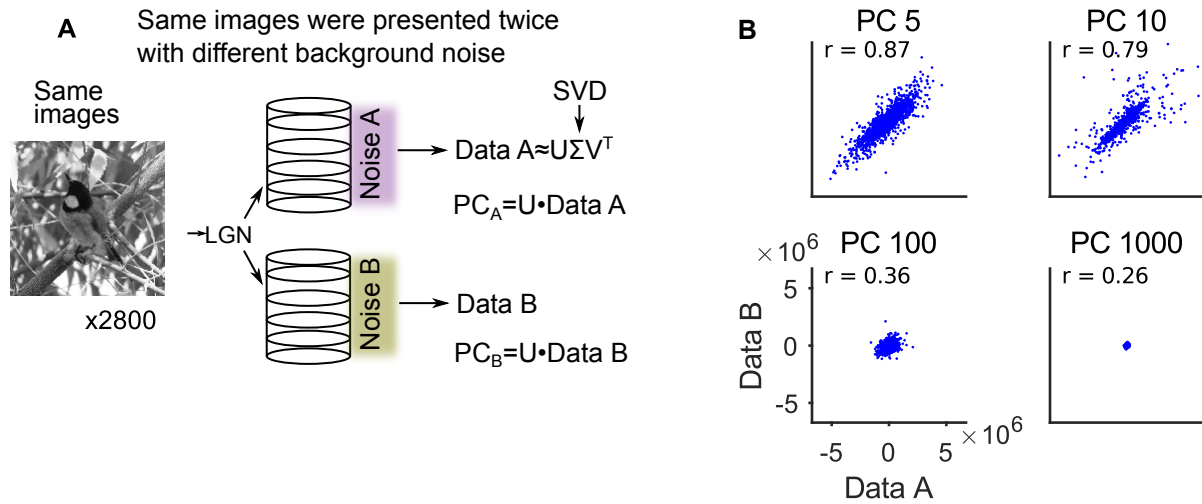

**Figure S2: Schematic diagram of cvPCA (cross-validated PCA) to extract signal and noise. (A)** Schematic diagram of cvPCA (cross-validated PCA). A set of generic images was presented twice with independently drawn noise for each image (Noise A and Noise B). Neural responses to the first presentation (Data A) were factorized by singular value decomposition (SVD) to estimate eigenspectrum of neural responses. **(B)** Correlations ( $r$ ) of neural responses for two presentations of the same natural image, using our data-based noise model with  $s = q = 2$  and projected onto selected principal components (PC).

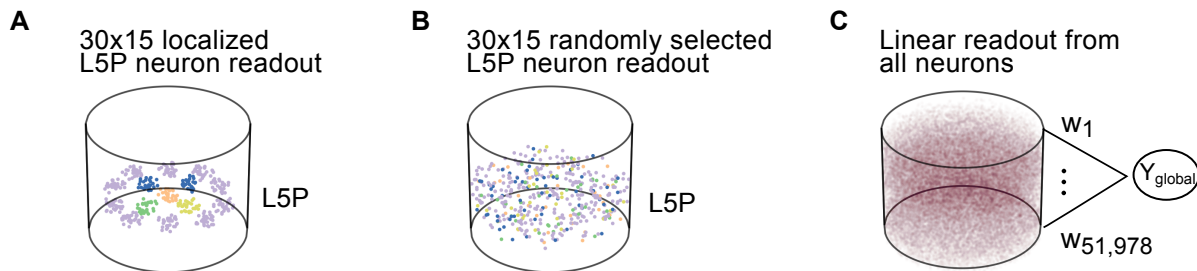

**Figure S3: Schematic diagram of difference readout scenarios. (A)** 15 spatially separated groups of 30 pyramidal neurons in L5 were selected to signal specific network outputs for 5 different tasks. Color encodes for 5 chosen tasks, same as in Fig. 2A. **(B)** Alternative selection of these 15 populations in L5 without spatial clustering leads to very similar performance. **(C)** Schematic diagram of a linear readout receives synaptic input from all 51,978 neurons in the microcircuit model, using a corresponding number of weights that can all be optimized for one particular task.

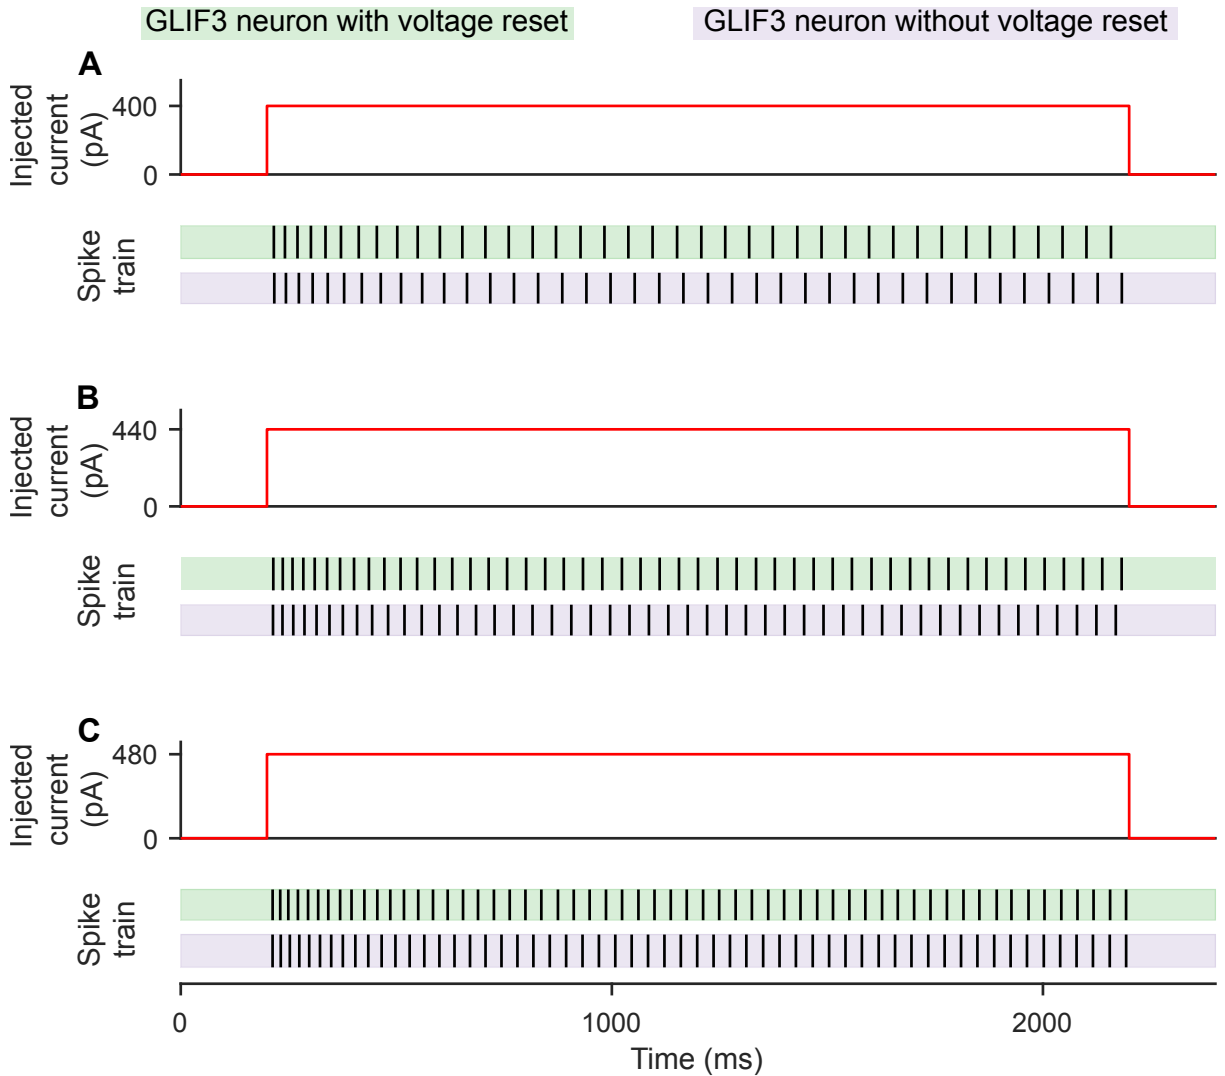

**Figure S4: Adding voltage reset does not significantly affect the GLIF<sub>3</sub> model.** (A) Stimulus in form of a step function (top) was inputted to the GLIF<sub>3</sub> model with voltage reset used in this study (middle) and the GLIF<sub>3</sub> model without voltage reset in (28). (B-C) Same as in (A) but for two different intensities of step stimuli. The difference between two models is so small that it can be ignored. Henceforth, we call our modified GLIF<sub>3</sub> model with voltage reset also as GLIF<sub>3</sub> model for convenience.



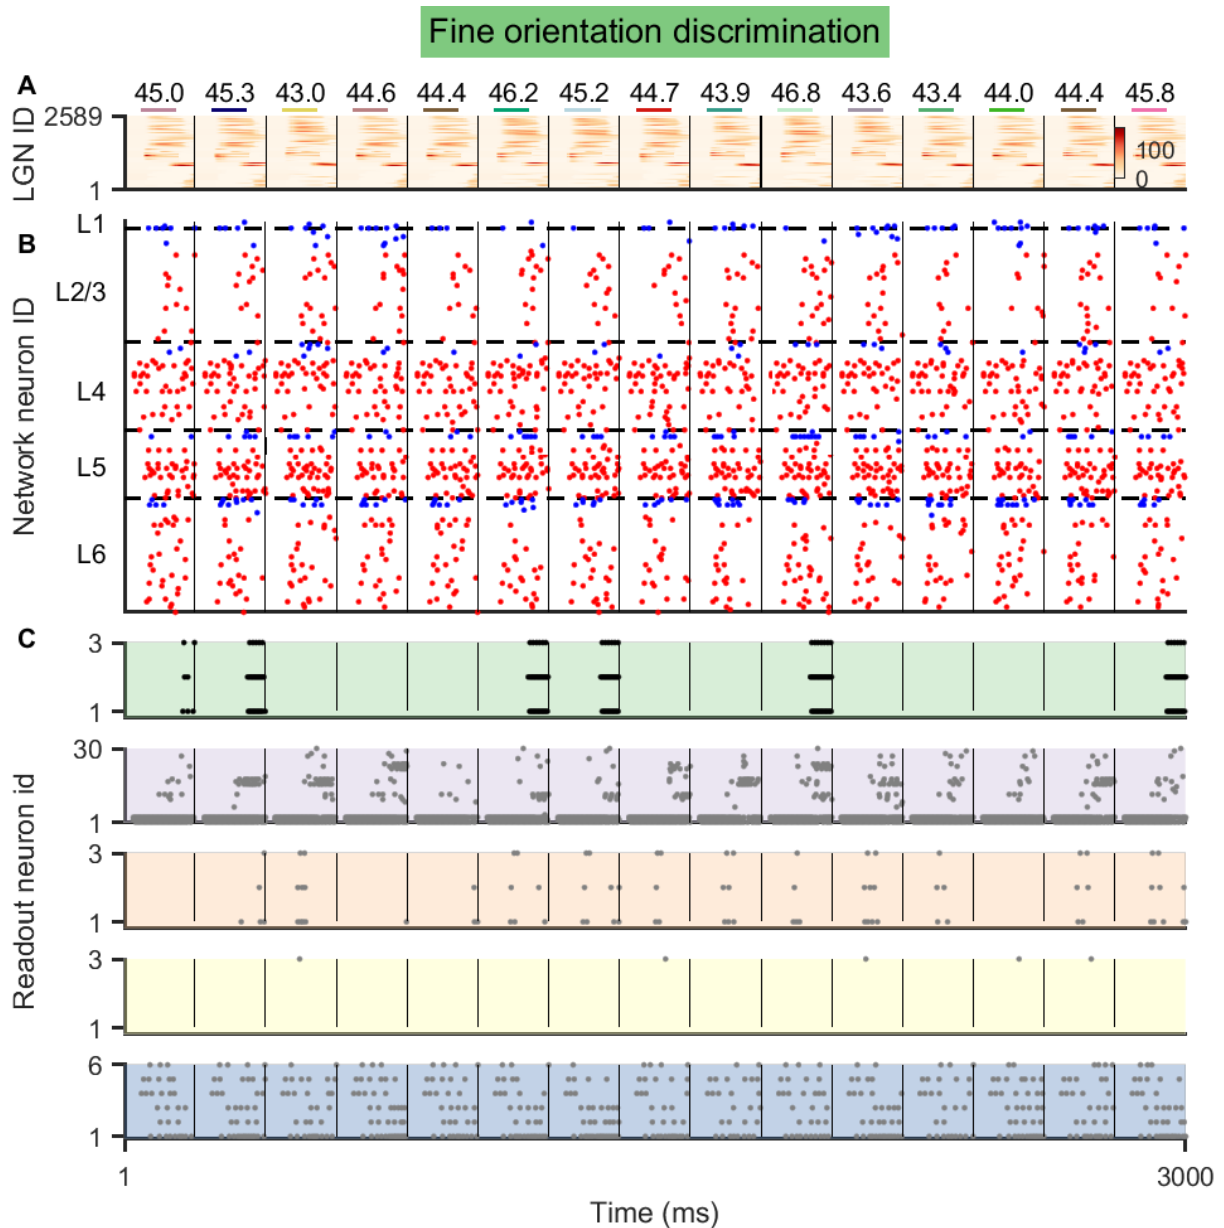

**Figure S5:** After learning, the model reliably distinguishes the orientation of gratings in the fine orientation discrimination task. **(A)** Colorful lines represent the timing of input images. Numbers on them represent the orientations of input gratings. The bottom colormap demonstrates the activity of LGN neuron activity. **(B)** Spike raster of the laminar V1 model. 200 neurons are sampled. Red and blue dots represent the spikes of excitatory and inhibitory neurons, respectively. Note that the spike and membrane potential of the model was reset to 0 after one classification was done (separated by the thick black line). **(C)** Spike raster of readout neurons. 10% of neurons are sampled in every readout population. Color codes of panels are the same as in Fig. 2A. From the top to bottom, there are readout populations of the fine orientation discrimination, the image classification, the visual change detection of nature images and gratings, and the evidence accumulation tasks.

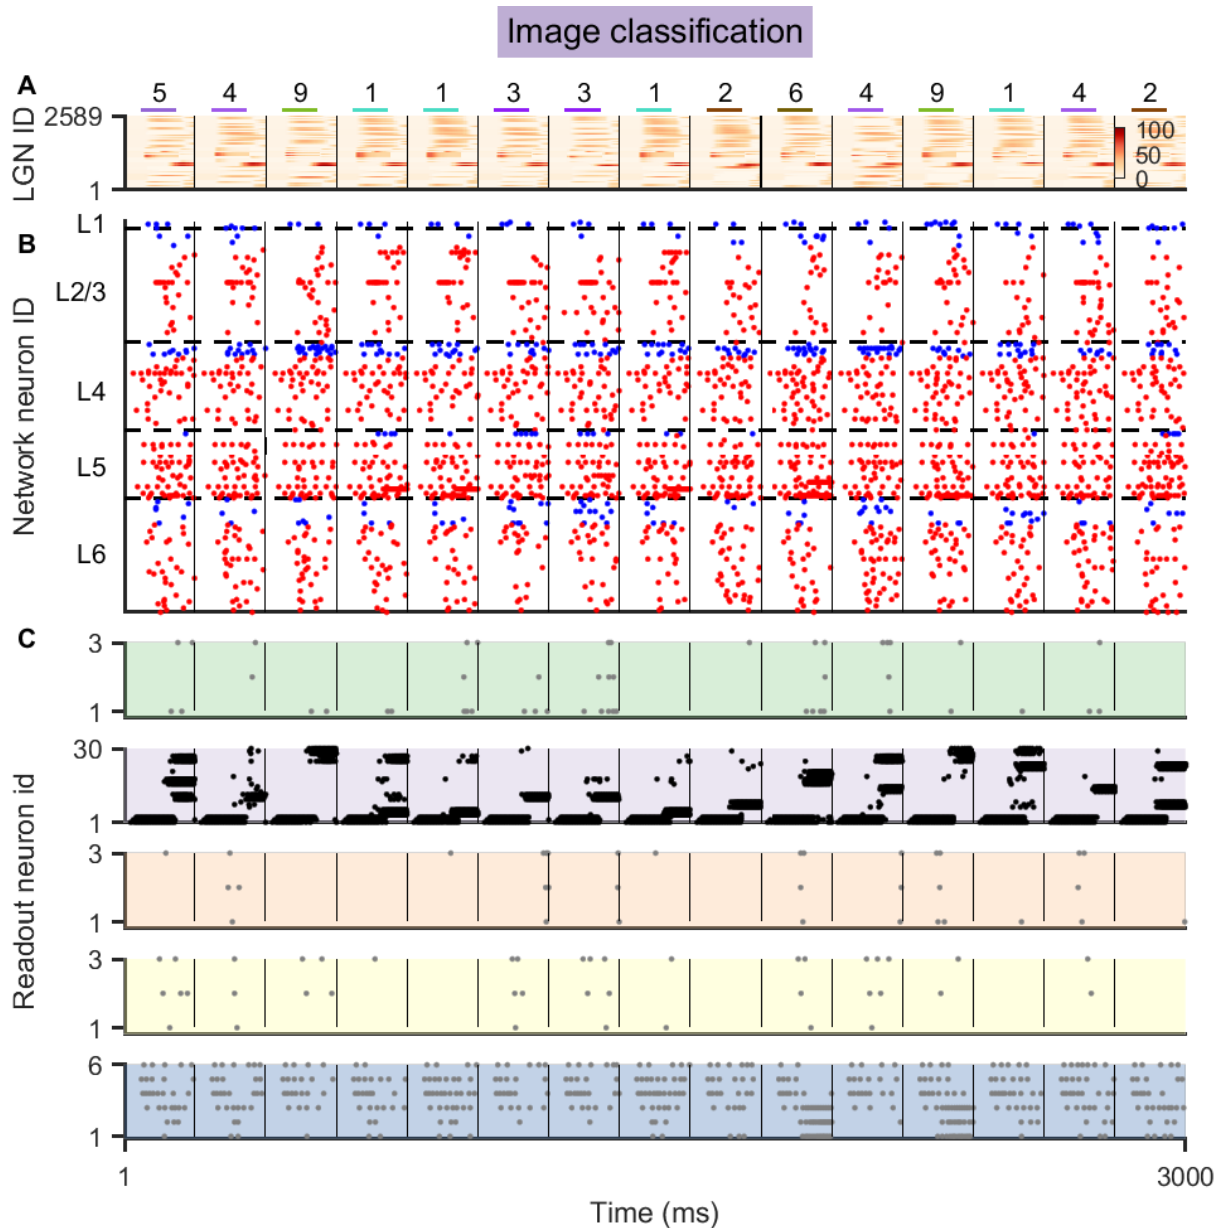

**Figure S6:** After learning, the model reliably classified the MNIST images. **(A)** Colorful lines represent the timing of input images. Numbers on them represent the digits in the input images. The bottom colormap demonstrates the activity of LGN neuron activity. **(B)** Spike raster of the laminar V1 model. 200 neurons are sampled. Red and blue dots represent the spikes of excitatory and inhibitory neurons, respectively. Red and blue dots represent the spikes of excitatory and inhibitory neurons, respectively. Note that the spike and membrane potential of the model was reset to 0 after one classification was done (separated by the thick black line). **(C)** Spike raster of readout neurons. 10% of neurons are sampled in every readout population. Color codes of panels are the same as in Fig. 2A. From the top to bottom, there are readout populations of the fine orientation discrimination, the image classification, the visual change detection of nature images and gratings, and the evidence accumulation tasks.

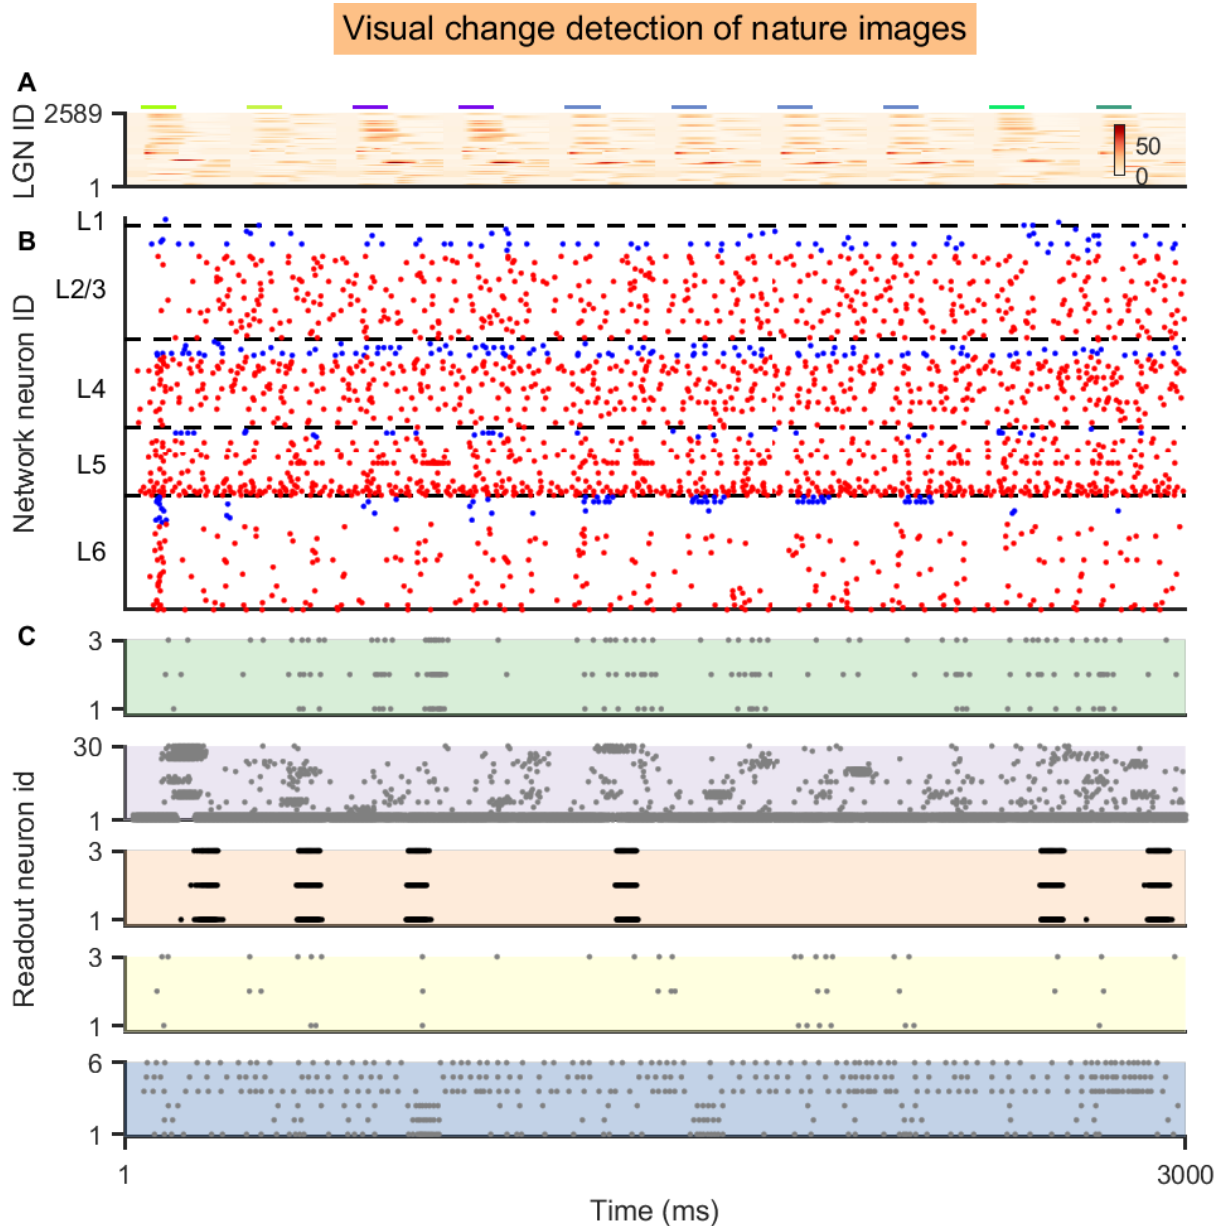

**Figure S7:** After learning, the model reliably reported the image identity change in the visual change detection task. **(A)** Colorful lines represent the timing of input images and the colors code the image identity. The bottom colormap demonstrates the activity of LGN neuron activity. **(B)** Spike raster of the laminar V1 model. 200 neurons are sampled. The slow noise was resampled every 600 ms. Red and blue dots represent the spikes of excitatory and inhibitory neurons, respectively. **(C)** Spike raster of readout neurons. 10% of neurons are sampled in every readout population. Color codes of panels are the same as in Fig. 2A. From the top to bottom, there are readout populations of the fine orientation discrimination, the image classification, the visual change detection of nature images and gratings, and the evidence accumulation tasks.

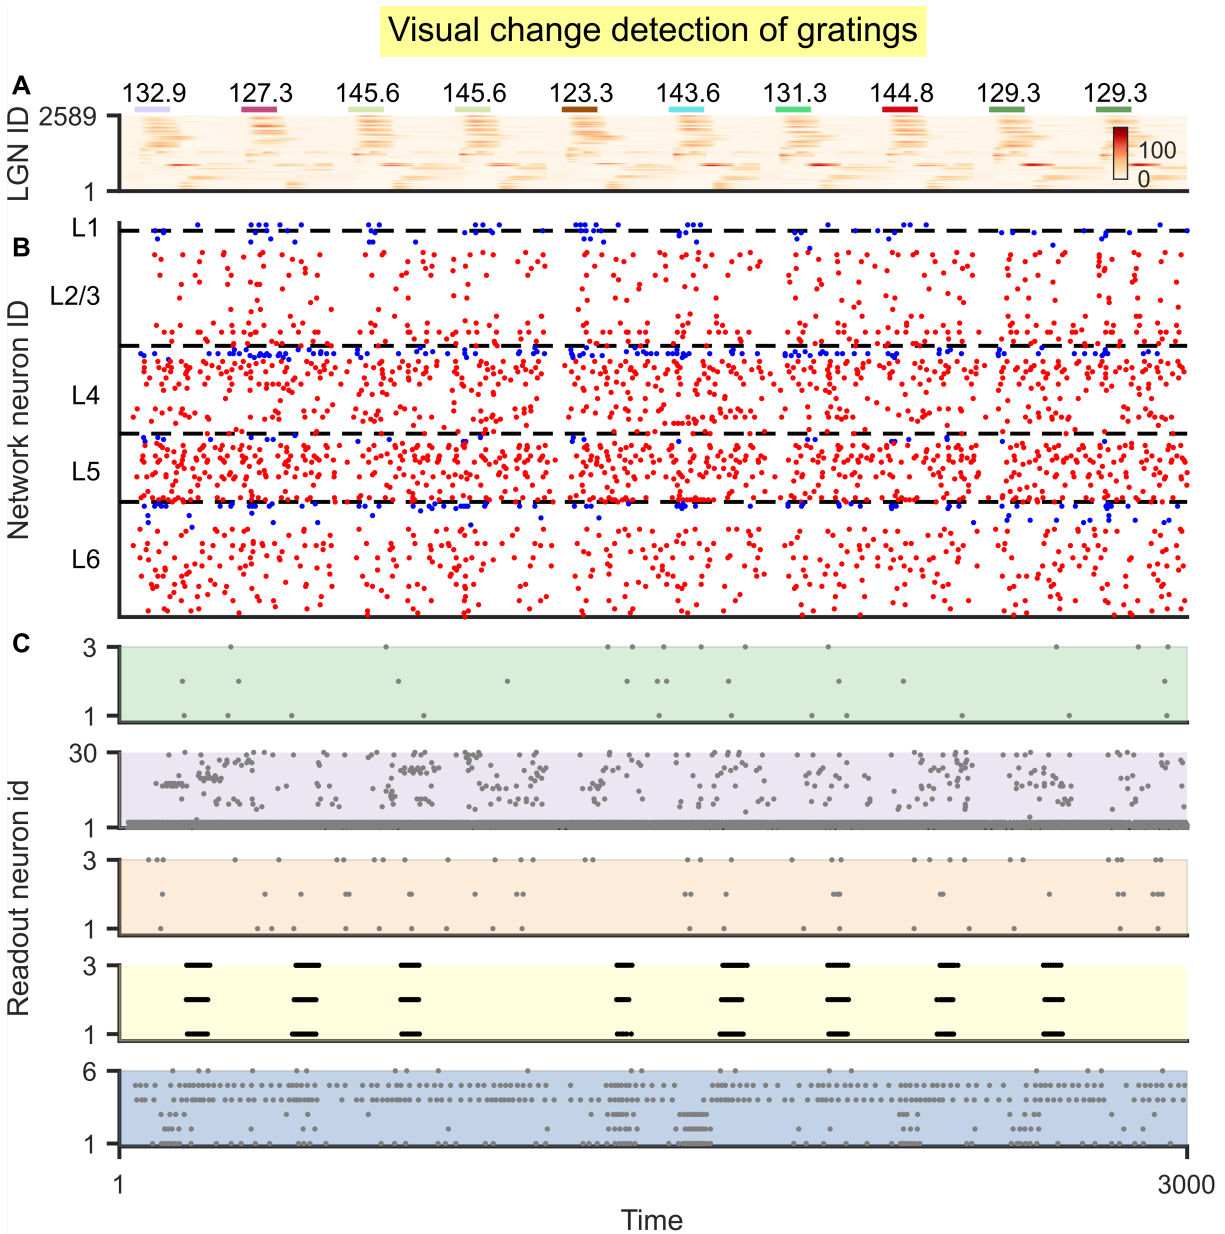

**Figure S8:** After learning, the model reliably reported the image identity change in the visual change detection task. **(A)** Colorful lines represent the timing of input images and the colors code the image identity. Numbers on them represent the orientations of input gratings. The bottom colormap demonstrates the activity of LGN neuron activity. **(B)** Spike raster of the laminar V1 model. 200 neurons are sampled. The slow noise was resampled every 600 ms. Red and blue dots represent the spikes of excitatory and inhibitory neurons, respectively. **(C)** Spike raster of readout neurons. 10% of neurons are sampled in every readout population. Color codes of panels are the same as in Fig. 2A. From the top to bottom, there are readout populations of the fine orientation discrimination, the image classification, the visual change detection of nature images and gratings, and the evidence accumulation tasks.

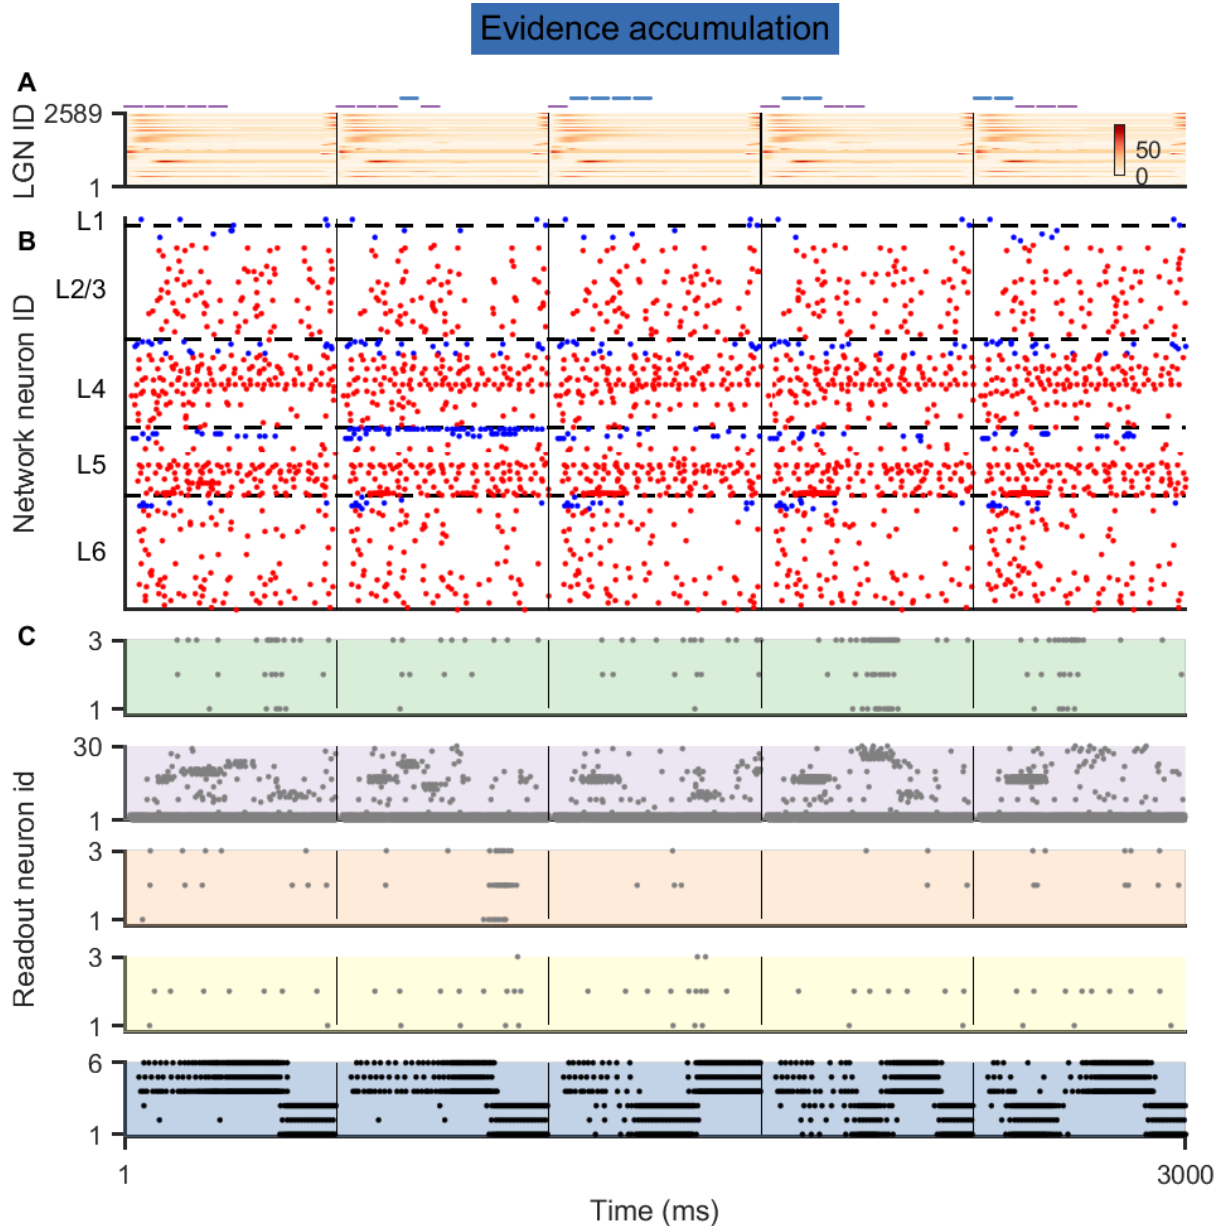

**Figure S9:** After learning, the spiking activity in the evidence accumulation task. **(A)** Colorful lines represent the timing of input left/right cues. The bottom colormap demonstrates the activity of LGN neuron activity. **(B)** Spike raster of the laminar V1 model. Red and blue dots represent the spikes of excitatory and inhibitory neurons, respectively. Note that the spike and membrane potential of the model was reset to 0 after one classification was done (separated by the thick black line). **(C)** Spike raster of readout neurons. 10% of neurons are sampled in every readout population. Color codes of panels are the same as in Fig. 2A. From the top to bottom, there are readout populations of the fine orientation discrimination, the image classification, the visual change detection of nature images and gratings, and the evidence accumulation tasks.

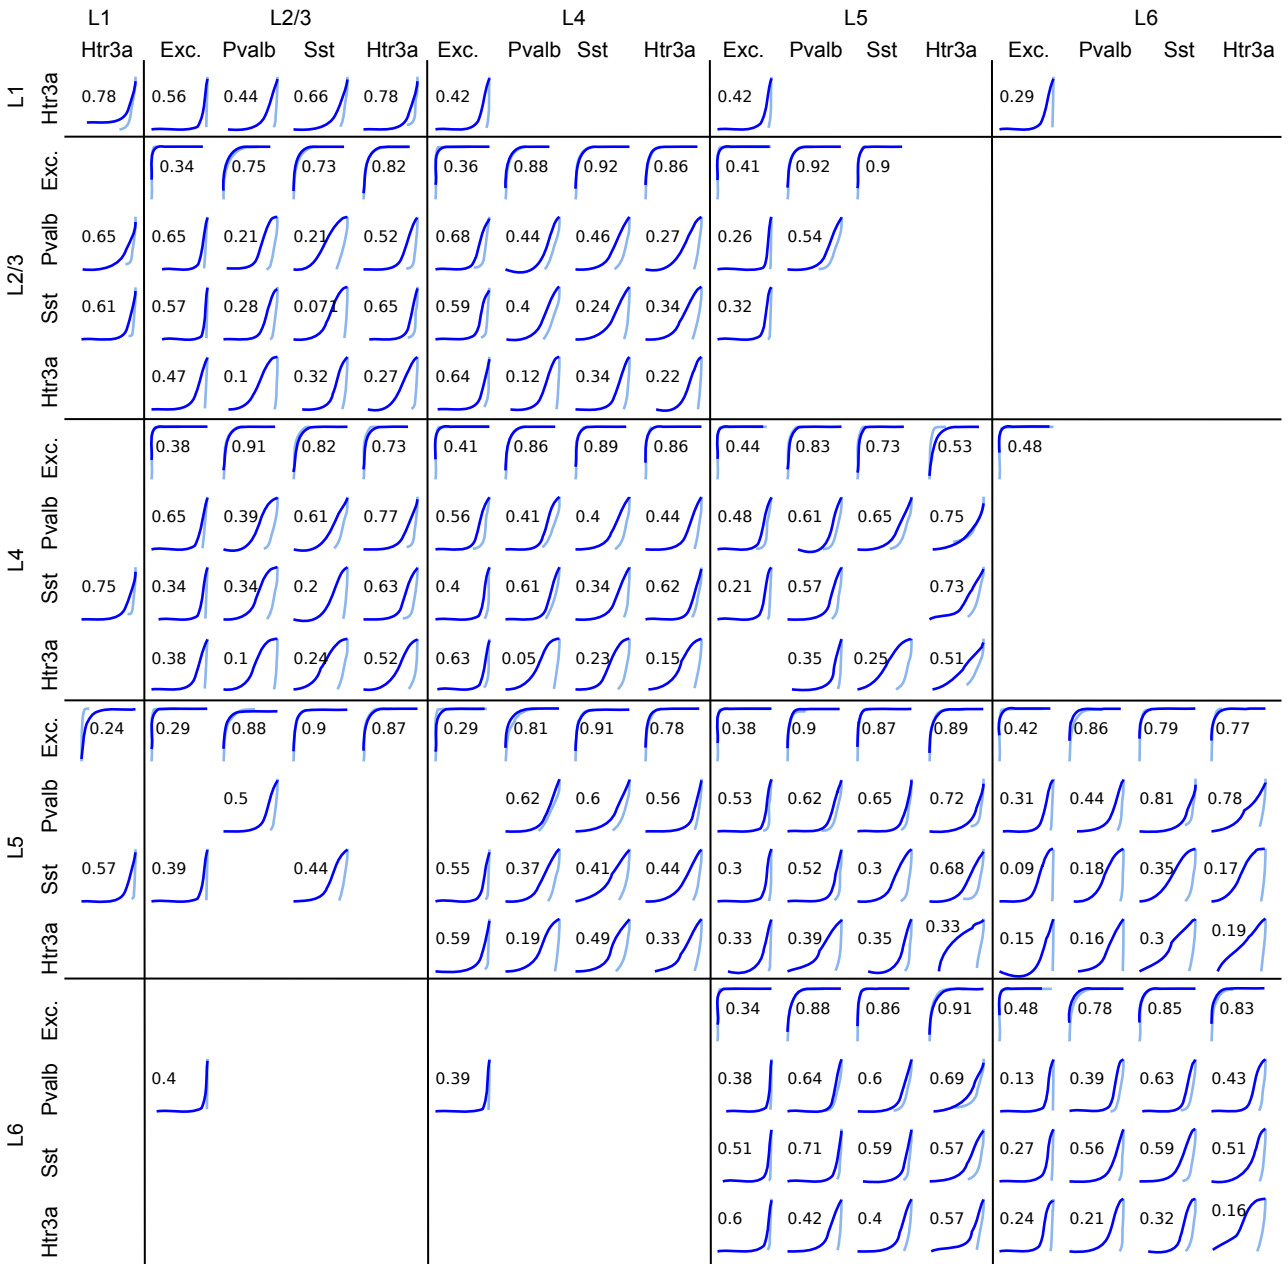

**Figure S10: Distribution of recurrent weights between each population before (light blue) and after learning (dark blue) the task.** Each row represents a pre-synaptic neuron population, and each column represents a post-synaptic neuron population. The histogram represents the distribution of synaptic weights of all synaptic connections that share the same pre-synaptic and post-synaptic neuron population. Vertical axis in each panel is log-scale. Horizontal axis is linear scale and horizontal range is from the smallest value to the largest value of each population. The number is  $1 - D$  where  $D$  is from the Kolmogorov-Smirnov test, quantifying the similarity between distributions ( $I$ ). Exc., excitatory neurons.

#### 764 4.15 Supplementary Note 1

765 **The differences of readout scenarios can explain why behavioral performance lags behind**  
766 **neural coding fidelity in area V1.** The behavioral discrimination threshold for orientations in the  
767 mouse V1 was almost 100 times larger than the discrimination threshold which they inferred from neural  
768 coding fidelity of populations of 50,000 neurons in area V1 of the mouse (4). They conjectured that this  
769 difference was caused by the limitations of downstream decoders. The Billeh et al. model suggests a  
770 slightly more refined explanation. Direct measurements of coding fidelity based on simultaneous record-  
771 ings from 50,000 neurons do not account for the fact that their information content has to be extracted  
772 by neurons in V1 that project to downstream areas. They are conceptually similar to the postulate  
773 of having a global readout neuron that receives synaptic input from all 50,000 neurons, see Fig. S3C.  
774 However, one can demonstrate in the Billeh et al. model that such a global linear readout attains for the  
775 fine orientation discrimination task an accuracy of 98.81%. On the other hand, a pool of 30 projection  
776 neurons on L5 could only achieve an accuracy of 93.15% if one assumed that they were localized closely  
777 together (Fig. S3A), and of 93.61% if they were assumed to be randomly distributed in L5 (Fig. S3D).  
778 These results suggest that how information from area V1 is extracted and projected to downstream areas  
779 is a limiting factor that is likely to contribute to the gap between the performance of an ideal observer  
780 of neural activity in V1 and the behavioral performance of mice.

#### 781 4.16 Supplementary Note 2

782 **Biological features speed up gradient descent training of spiking neural networks.** We applied  
783 the same training procedure also to control models that lacked salient structural features of the Billeh et  
784 al. model (Materials and Methods), and found that their task performance advances substantially slower.  
785 We found that during the training time, the Billeh et al. model achieved an approximately saturating  
786 task performance, whereas these control models (all models contain 51,978 neurons) were only able to  
787 reach a substantially lower task performance level in 6 epochs, see Fig. 3F. Substantially larger computing  
788 resources will be needed to determine the performance levels that these control models can eventually  
789 reach after sufficiently long training.

790 It had already been shown that neuron models with slower changing internal variables tend to enhance  
791 BPTT training, see Fig. 2D of (27), and Fig. 3C and Supplementary Movie of (40). Fig. 3C of  
792 the latter reference also shows that a similar training advantage holds for a biologically more plausible  
793 variant of gradient descent learning. But Fig. 3F shows that also the laminar connectivity structure of  
794 the Billeh et al. model contributes to its learning speed, even if the neuron models remain unchanged  
795 (yellow curve). One possible explanation is that the laminar structure enforces topographic maps between  
796 different layers, and hence tends to keep information more local within the network. The data-based rapid  
797 spatial decay of connection probabilities within a layer has a similar effect. This locality of information  
798 processing may facilitate learning through local learning mechanisms in such network. In contrast, in a  
799 generic randomly connected network without this connectivity structure, all information is continuously  
800 dissipated throughout the network, which is likely to impede the localization of processing errors and  
801 their correction.

802 It will be interesting to see whether this effect also arises for biologically more realistic learning methods,  
803 for example, *e-prop* (40), which we did not perform because training with such methods tends to take  
804 substantially more trials, and therefore exceeded our computing resources. But since we now know that  
805 the Billeh et al. model is able to carry out the 5 visual processing tasks that we considered, one can now  
806 look for various biologically more realistic ways in the network initialization and/or learning algorithm  
807 -also for smaller instances of the Billeh et al. model- that can induce a similar computing capability or

808 neural coding features.
